1 **Effects of constitutive and acute Connexin 36 deficiency on brain-wide susceptibility to**  
2 **PTZ-induced neuronal hyperactivity**

3

4 (Keywords: seizure, MAP-mapping, epilepsy, gap junction)

5

6 **Alyssa A. Brunal**<sup>1,2</sup>, **Kareem C. Clark**<sup>1</sup>, **Manxiu Ma**<sup>1</sup>, **Y. Albert Pan**<sup>1,3,4\*</sup>

7 <sup>1</sup>Center for Neurobiology Research, Fralin Biomedical Research Institute at Virginia Tech Carilion,  
8 Virginia Tech, Roanoke, VA.

9 <sup>2</sup>Translational Biology Medicine and Health Graduate Program, Virginia Tech, Blacksburg VA,  
10 24061.

11 <sup>3</sup>Department of Biomedical Sciences and Pathobiology, Virginia-Maryland College of Veterinary  
12 Medicine, Virginia Tech, Blacksburg, VA.

13 <sup>4</sup>Department of Psychiatry and Behavioral Medicine, Virginia Tech Carilion School of Medicine,  
14 Roanoke, VA.

15

16 \*Correspondence should be addressed to Y. Albert Pan [yapan@vtc.vt.edu](mailto:yapan@vtc.vt.edu)

17

18 **Conflict of Interest**

19 The authors declare no conflict of interest.

20 **Acknowledgments**

21 This work was supported by funding from the Commonwealth Research Commercialization Fund  
22 (ER14S-001-LS to Y.A.P.) and Virginia Tech. We thank the animal care staff at Virginia Tech for  
23 animal husbandry and Dr. Adam Miller for the *cx35.5* mutant zebrafish. We are also appreciative  
24 of Dr. Susan Campbell and Dr. James Smyth for their helpful suggestions.

25 **Author Contributions**

26 A.B. and Y.A.P. conceived the study. A.B. performed the experiments and analyzed the data.

27 K.C.C. and M.M. contributed to the MAP-mapping analysis. A.B. and Y.A.P. wrote the

28 manuscript.

29 **ABSTRACT**

30           Connexins are transmembrane proteins that form hemichannels allowing the exchange of  
31 molecules between the extracellular space and cell interior. Two hemichannels from adjacent  
32 cells dock and form a continuous gap junction pore, thereby permitting direct intercellular  
33 communication. Connexin 36 (Cx36), expressed primarily in neurons, is involved in the  
34 synchronous activity of neurons and may play a role in aberrant synchronous firing, as seen in  
35 seizures. To understand the reciprocal interactions between Cx36 and seizure-like neural activity,  
36 we examined three questions: a) does Cx36 deficiency affect seizure susceptibility, b) does  
37 seizure-like activity affect Cx36 expression patterns, and c) does acute blockade of Cx36  
38 conductance increase seizure susceptibility. We utilize the zebrafish pentylenetetrazol (PTZ; a  
39 GABA(A) receptor antagonist) induced seizure model, taking advantage of the compact size and  
40 optical translucency of the larval zebrafish brain to assess how PTZ affects brain-wide neuronal  
41 activity and Cx36 protein expression. We exposed wild-type and genetic Cx36-deficient (*cx35.5-*  
42 *-/-*) zebrafish larvae to PTZ and subsequently mapped neuronal activity across the whole brain,  
43 using phosphorylated extracellular-signal-regulated kinase (pERK) as a proxy for neuronal  
44 activity. We found that *cx35.5**-/-* fish exhibited region-specific susceptibility and resistance to PTZ-  
45 induced hyperactivity compared to wild-type controls, suggesting that genetic Cx36 deficiency  
46 may affect seizure susceptibility in a region-specific manner. Regions that showed increased PTZ  
47 sensitivity include the dorsal telencephalon, which is implicated in human epilepsy, and the lateral  
48 hypothalamus, which has been underexplored. We also found that PTZ-induced neuronal  
49 hyperactivity resulted in a rapid reduction of Cx36 protein levels. 30 minutes and one-hour  
50 exposure to 20 mM PTZ significantly reduced the expression of Cx36. This Cx36 reduction  
51 persists after one-hour of recovery but recovered after 3-6 hours. This acute downregulation of  
52 Cx36 by PTZ is likely maladaptive, as acute pharmacological blockade of Cx36 by mefloquine  
53 results in increased susceptibility to PTZ-induced neuronal hyperactivity. Together, these results  
54 demonstrate a reciprocal relationship between Cx36 and seizure-associated neuronal

55 hyperactivity: Cx36 deficiency contributes region-specific susceptibility to neuronal hyperactivity,  
56 while neuronal hyperactivity-induced downregulation of Cx36 may increase the risk of future  
57 epileptic events.

## 58 INTRODUCTION

59 Connexins are transmembrane proteins that oligomerize to form a transmembrane pore  
60 called a hemichannel, which enables the exchange of molecules between the extracellular space  
61 and cell interior. Two hemichannels between adjacent cells can dock and form a continuous pore,  
62 known as a gap junction, allowing for direct intercellular coupling. Inter-neuronal gap junctions  
63 form electrical synapses, which are responsible for fast synaptic transmission and the  
64 synchronous firing of neurons within the brain (Rash et al., 2012). Connexin 36 (Cx36) is the main  
65 connexin expressed by neurons. It is involved in brain functions that rely on synchronous firing  
66 such as learning and memory (Allen, Fuchs, Jaschonek, Bannerman, & Monyer, 2011; Wang &  
67 Belousov, 2011), retina visual processing (Kovács-Öller et al., 2017), and sensorimotor reflex in  
68 the zebrafish (Miller et al., 2017). As the key structural component of electrical synapses, Cx36  
69 may also act as a therapeutic target in diseases involving deficiencies in fast communication and  
70 aberrant synchronous firing, such as seizures. However, the reciprocal relationships between the  
71 Cx36 and seizures have remained unclear.

72 Previous work has examined the roles of Cx36 in the pathogenesis of seizures, but there  
73 has been no consensus on whether Cx36 increases or decreases seizure susceptibility (Gajda,  
74 Szupera, Blazsó, & Szente, 2005; Jacobson et al., 2010; Shin, 2013; Voss, Mutsaerts, & Sleigh,  
75 2010a). Jacobson et al. (2010) found that Cx36 knockout mice exhibited an increase in seizure-  
76 like behaviors following the administration pentylentetrazol (PTZ; a GABA(A)-receptor  
77 antagonist), indicating that normal expression of Cx36 may be protective against seizure-inducing  
78 conditions. However, this finding contradicts studies using the connexin blocking drug quinine,  
79 which found the drug either decreased the severity of seizures (Gajda et al., 2005), or showed no  
80 change (Voss, Mutsaerts, & Sleigh, 2010b). The discrepancy may potentially be due to the  
81 difference between chronic Cx36 deficiency (Cx36 knockout) versus acute Cx36 deficiency  
82 (quinine). However, quinine has broad antagonistic activity against many different connexins

83 expressed in the nervous system, and the effects cannot be attributed solely to the inhibition of  
84 Cx36 (Cruikshank et al., 2004; Manjarrez-Marmolejo & Franco-Pérez, 2016). Additionally, the  
85 difference in seizure induction methods and seizure metrics also makes direct comparisons  
86 between studies problematic.

87 Previous findings are also mixed regarding how neuronal hyperactivity affects the  
88 expression of Cx36. In rodent seizure models and epilepsy patient post-mortem samples, some  
89 groups have found that Cx36 expression was increased (Collignon et al., 2006; Laura, Xóchitl,  
90 Anne, & Alberto, 2015; X. Wu, Wang, Hao, & Feng, 2017), while others found decreased Cx36  
91 expression (Condorelli, Trovato-Salinaro, Mudo, Mirone, & Belluardo, 2003; Söhl et al., 2000) or  
92 no change (Motaghi, Sayyah, Babapour, & Mahdian, 2017). Furthermore, even though seizures  
93 result in brain-wide changes in neuronal connectivity (Morgan, Gore, & Abou-Khalil, 2010),  
94 seizure-induced changes in Cx36 expression had only been examined in the dorsal telencephalon  
95 (cortex and hippocampus) (Condorelli et al., 2003; Laura et al., 2015; Motaghi et al., 2017; X. L.  
96 Wu et al., 2018). Potential changes to Cx36 expression in other brain areas following neuronal  
97 hyperactivity remain unknown.

98 To further investigate the relationship between Cx36 and neuronal hyperactivity and  
99 address the technical limitations listed above, we employ zebrafish as an experimental system.  
100 The small size of zebrafish larvae facilitates imaging of the whole brain under a laser scanning  
101 confocal microscope, which provides a unique opportunity to examine whole-brain activity as well  
102 as dynamic Cx36 protein regulation in an intact vertebrate organism. Additionally, the PTZ-  
103 induced seizure model in zebrafish has been well-characterized physiologically and behaviorally  
104 (Afrikanova et al., 2013; S.C. Baraban, Taylor, Castro, & Baier, 2005; Burrows et al., 2020;  
105 Copmans, Siekierska, & de Witte, 2017) and is an effective model in identifying therapeutics to  
106 target epilepsy in humans (Scott C. Baraban, Dinday, & Hortopan, 2013).

107           Using zebrafish, we created a whole-brain activity map following hyperactivity using the  
108 MAP-mapping method (Randlett et al., 2015) to determine that there are both dose-varying and  
109 region-specific changes in neuronal hyperactivity following administration of PTZ. Additionally, we  
110 created a whole-brain expression map of Cx36 following the administration of PTZ. With this, we  
111 determined specific brain regions that showed decreases in Cx36 expression following  
112 hyperactivity. Finally, by acutely reducing the function of Cx36 using the Cx36 blocking drug,  
113 mefloquine, we determined that acute inhibition of Cx36 is detrimental, and leaves the animal  
114 more susceptible to PTZ-induced hyperactivity than their untreated counterparts.

## 115 **METHODS**

### 116 **Zebrafish Husbandry**

117 All zebrafish used in this study were pigmentless (*nacre*<sup>-/-</sup>) in a mixed background of AB and TL  
118 wild-type strains (Zebrafish International Resource Center). *cx35.5* (ZFIN gene symbol: *gjd2a*)  
119 heterozygotes were gifts from Dr. Adam Miller at the University of Oregon (Marsh, Michel, Adke,  
120 Heckman, & Miller, 2017). Zebrafish embryos and larvae were raised under 14 h light/10 h dark  
121 cycle at 28.5°C in water containing 0.1% Methylene Blue hydrate (Sigma-Aldrich). Sex is not a  
122 relevant variable for the larval stages being used (0-6 days post-fertilization, dpf), as laboratory  
123 zebrafish remain sexually undifferentiated until two weeks of age (Maack & Segner, 2003; Wilson  
124 et al., 2014). All husbandry procedures and experiments were performed according to protocols  
125 approved by the Institutional Animal Care and Use Committee at Virginia Tech.

### 126 **Immunohistochemistry**

127 Zebrafish larvae were fixed overnight in 4% paraformaldehyde (PFA) on a rocker at 4°C. Samples  
128 were then processed and stained as previously described by Randlett et al. (2015). Primary  
129 antibodies that were used are as follows: p44/42 MAPK (tERK) (L34F12, Cell Signaling  
130 Technologies), Phospho-p44/42 MAPK (pERK) (D13.14.4E, Cell Signaling Technologies), and

131 Anti-activated Caspase 3 (BD Pharmingen). For the Connexin antibody (36/GJA9, Invitrogen),  
132 fish were fixed in 2% TCA for 3 hours, and sample processing and staining were performed as  
133 previously described (Marsh et al., 2017).

#### 134 **MAP-(Activity Map):**

135 Wild-type and *cx35.5* mutant in 6 dpf zebrafish larvae were first acclimated for 15 minutes in a 6-  
136 well plate and then transferred into a well containing 0 mM (E3 embryo media only), 2 mM, 5 mM,  
137 10 mM, or 20 mM PTZ in embryo media for 15 minutes. Larvae were then fixed in 4% PFA  
138 overnight and immunostained and imaged using a Nikon A1 confocal microscope. Subsequent  
139 MAP-mapping analysis was performed as previously described (Randlett et al., 2015). Brain  
140 regions highlighted in the text of this document were selected based on the following criteria: only  
141 brain regions were selected (individual neuron clusters were not mentioned), and only brain  
142 regions with well-defined functions were selected to be highlighted. All identified brain regions  
143 and neuron clusters can be found in the Supplementary tables.

#### 144 **Cx36 Expression Map:**

145 6 dpf larvae were acclimated for 15 minutes in a 6-well plate with embryo media and then  
146 transferred into a well containing 20 mM PTZ for either 30 minutes or 1 hour. Larvae were then  
147 either fixed immediately or allowed to recover for 1 hour, 3 hours, 6 hours, or 24 hours in embryo  
148 media. Larvae were fixed in 2% trichloroacetic acid (TCA) for 3 hours and immunostained as  
149 previously described (Miller et al., 2017). Confocal images were then morphed to a tERK standard  
150 brain image stack using CMTK (Randlett et al., 2015). To subtract background signal, an average  
151 stack of *cx35.5*<sup>-/-</sup> fish morphed and stained in the same way was subtracted from all images and  
152 then were processed as previously described, except for replacing pERK with the morphed and  
153 background subtracted anti-Cx36 (Randlett et al., 2015).

#### 154 **Cell Death Quantification:**

155 6 dpf mutant and wild-type larvae were first acclimated for 15 minutes in a 6-well plate and then  
156 transferred into a well containing either embryo medium or 20 mM PTZ for 1 hour. Larvae were  
157 then immediately fixed in 4% PFA overnight, and immunostained images were morphed to a  
158 standard brain and analyzed as previously described (Randlett et al., 2015). ROIs for the  
159 Diencephalon, Mesencephalon, Telencephalon from ZBrain were then overlaid on each stack,  
160 and Caspase positive cells were counted in each ROI. Standard unpaired t-tests with Welch's  
161 correction for multiple comparisons were run between each group in GraphPad Prism.

### 162 **Mefloquine Treatment:**

163 At 6 dpf, larvae were exposed to either 0.025% DMSO (vehicle group) or 25  $\mu$ M mefloquine. After  
164 3 hours of exposure, fish and their relative media (either DMSO or mefloquine) were transferred  
165 to a 6 well plate and allowed to acclimate for 15 minutes. Larvae were then transferred to embryo  
166 media with 0 mM, 2 mM, 5 mM, 10 mM, or 20 mM PTZ for 15 minutes. Larvae were then  
167 immediately fixed in 4% PFA overnight, immunostained, and imaged using a Nikon A1 confocal  
168 microscope. Subsequent analysis was performed as previously described (Randlett et al., 2015).

### 169 **Image Processing and Statistical Analysis:**

170 Images were processed and quantified using Fiji (Schindelin et al., 2012). MATLAB 2019  
171 (MathWorks) was used for MAP-mapping analysis (Randlett et al., 2015). For Caspase-3  
172 quantification, statistical analyses were performed in GraphPad Prism (Version 8). Student's t-  
173 test with Welch's correction for multiple comparisons was performed. Results were considered  
174 significant if  $p < 0.05$ .

175

## 176 **RESULTS**

177 **PTZ induces brain-wide neuronal hyperactivation in a dose-dependent manner.**



178 PTZ inhibits GABA(A) receptor-mediated inhibitory neurotransmission, which leads to  
179 global neuronal hyperactivation and seizure-like neurological and behavioral phenotypes in both  
180 rodents and zebrafish (S.C. Baraban et al., 2005). To determine whether different brain regions  
181 have distinct sensitivities to PTZ-induced neuronal hyperactivation, we first compared whole-brain  
182 activity maps in wild-type fish exposed to varying concentrations of PTZ. To do this, we utilized  
183 the MAP-mapping assay to create whole-brain activity maps (Randlett et al. 2015). MAP-mapping  
184 utilizes the ratio of total extracellular signal-regulated kinase (tERK), which is present in all  
185 neurons, and phosphorylated ERK (pERK), the phosphorylated form of ERK that is induced  
186 (within 10 minutes) following neuronal activity. The ratiometric pERK/tERK signal can then be  
187 quantified and statistically tested in an annotated 3D brain atlas (Z-Brain) (Randlett et al. 2015).

188 Using MAP-mapping, we found region-specific changes in neuronal activity in response  
189 to varying concentrations of PTZ. We treated wild-type animals by bath-exposing them to embryo  
190 media with 2, 5, 10, and 20 mM PTZ for 15 minutes. Animals exposed to media only were used  
191 as the baseline for comparison. Neuronal activity was measured by the pERK/tERK ratio as  
192 described previously (Randlett et al., 2015). After exposure to 2 mM PTZ, we saw moderate  
193 increases in neuronal activity in more restricted brain areas in regions responsible for homeostatic  
194 regulation (hypothalamus and preoptic area) and executive functioning (subpallium, pallium) as  
195 well as the cerebellum (Figure 1A). After exposure to 5, 10, and 20 mM PTZ, we observed broader  
196 increases in brain-wide neuronal activity (Figure 1B-D). These regions include those that were  
197 activated by 2 mM PTZ (hypothalamus, preoptic area, subpallium, and in many regions involved  
198 in movement control such as the pretectum, cerebellum, and oculomotor nuclei. Additionally, we  
199 observed some brain areas that became less active after exposure to PTZ: the telencephalon  
200 was less active at 10 and 20 mM PTZ than at lower concentrations (Figure 1D) and the olfactory  
201 bulb was less active across all PTZ concentrations (Figure 1A-D). The complete list of all identified  
202 changes is provided in Supplementary Table 1.

203 Overall, we were able to generate a PTZ dose-varying whole-brain activity map in 6 dpf  
204 zebrafish. We saw increased neuronal activity in areas previously identified to be involved in PTZ  
205 induced hyperactivity such as the pallium and optic tectum (Liu & Baraban, 2019). We also  
206 identified additional regions that were previously unidentified such as the hypothalamus.

### 207 **Genetic Cx36 deficiency results in changes in PTZ-induced brain-wide neuronal** 208 **hyperactivity**

209 To understand what effect loss of Cx36 has on hyperactivity we examined whole-brain  
210 activity changes at different concentrations of PTZ in the *cx35.5*<sup>-/-</sup> larvae. As the expression of  
211 the two zebrafish paralogs of Cx36, Cx35.5 and Cx34.1, are mutually dependent, loss of *cx35.5*  
212 results in near-complete loss of both Cx36 paralogs (Miller et al., 2017 and also Figure 3B). We  
213 again employed the MAP-mapping technique to determine which brain regions show a significant  
214 difference between PTZ-treated mutants and untreated mutants. Similar to their wild-type siblings,  
215 at 2 mM PTZ, significant increases in neuronal activity in the preoptic area, subpallium, and the  
216 hypothalamus were observed (Figure 1E). Additionally, we saw increases in the retinal  
217 arborization fields associated with visual processing (Figure 1E). At 5, 10, and 20 mM PTZ, we  
218 found a very similar map to that of their wild-type siblings, with increases and decreases in many  
219 of the same major brain regions listed previously (Figure 1F-H). For a complete list of significantly  
220 change brain regions, see Supplementary Table 1.

### 221 **Changes in *cx35.5*<sup>-/-</sup> whole-brain activity maps compared to wild-type**

222 To understand differences in neuronal hyperactivity between *cx35.5*<sup>-/-</sup> and wild-type animals,  
223 we compared the activity map of *cx35.5*<sup>-/-</sup> and wild-type siblings at baseline (media only) and  
224 after exposure to different concentrations of PTZ (Figure 1I-M). We observed no increases in  
225 neuronal activity at baseline, however, we did observe decreases in activity in *cx35.5*<sup>-/-</sup> relative  
226 to wild-type in the rhombencephalon reticulospinal neurons and medial vestibular neurons (Figure

227 1I). At 2 mM PTZ, there were no significant changes in brain-wide neuronal activity between  
228 *cx35.5*<sup>-/-</sup> and wild-type siblings (Figure 1J). At 5 mM PTZ, there were small increases in activity  
229 in the hypothalamus and the subpallium (Figure 1K). At 10 mM PTZ, we observed increases in  
230 the hypothalamus and various regions within the rhombencephalon (Figure 1L). We also found  
231 regions that show less of an increase in activity in *cx35.5*<sup>-/-</sup> compared to wild-type within the  
232 rhombencephalon specifically in regions that rely on the synchronous firing capabilities of Cx36  
233 (Mauthner cells, inferior olive) (Bazzigaluppi et al., 2017; Flores et al., 2012; Yao et al., 2014). At  
234 the highest concentration (20 mM), we saw increased activity in the *cx35.5*<sup>-/-</sup> compared to wild-  
235 type in areas previously identified as associated with seizures such as the pallium (Liu & Baraban,  
236 2019) as well as the hypothalamus. These regions are similar to our findings in the wild-type  
237 animals after PTZ exposure, indicating an increase in severity of hyperactivity in these regions  
238 following treatment with PTZ in *cx35.5*<sup>-/-</sup> animals. We also observed regions that show fewer  
239 increases in activity in the rhombencephalon, relative to wild-type, similar to 10 mM PTZ, but they  
240 are less severe (Figure 1L, M). For a complete list of regional differences, please see  
241 Supplementary Table 1.

## 242 **Genetic Cx36 deficiency does not affect cell death at baseline or after PTZ**

243 We determined that PTZ alone and PTZ in combination with *cx35.5* deficiency resulted in  
244 regional and dose-varying changes in whole-brain neuronal activity. One possible explanation is  
245 that *cx35.5* mutation may result in altered neuronal cell death, either at baseline or after PTZ,  
246 which would then alter the overall balance of brain-wide connectivity. To test this, we stained for  
247 activated caspase-3 (a marker of apoptotic cells) and quantified the number of positive cells in  
248 each of the major brain divisions (rhombencephalon, mesencephalon, telencephalon, and  
249 diencephalon). We found that there were no differences at baseline (media only) in the number  
250 of caspase-3 positive cells between *cx35.5*<sup>-/-</sup> and wild-type siblings in any of the major brain  
251 divisions (Figure 2A, B, D, E). Additionally, no difference in the number of caspase-3 positive cells

252 when comparing both *cx35.5*<sup>-/-</sup> and wild-type siblings after 20 mM PTZ was found (Figure 2C, F).  
253 From these data, we, therefore, conclude that changes in neuronal response in *cx35.5* animals  
254 are not likely caused by altered cell death induction.

### 255 **Creation of the whole-brain Cx36 expression map**

256 To understand how neuronal hyperactivity affects Cx36, we created a whole-brain *expression*  
257 map to efficiently, and in a non-biased manner, measure changes in protein expression using a  
258 modified MAP-mapping processing procedure. We utilized a previously-validated human anti-  
259 Cx36 antibody and stained wild-type (Figure 3A) and *cx35.5*<sup>-/-</sup> (Figure 3B) siblings. Consistent  
260 with previous studies, near-complete loss of anti-Cx36 staining in *cx35.5*<sup>-/-</sup> animals was detected.  
261 To quantify Cx36 expression across the whole brain, we performed image normalization (with  
262 CMTK) and subtracted the average stack of all *cx35.5*<sup>-/-</sup> fish from each animal. We then followed  
263 the same MAP-mapping processing pipeline to quantify the Cx36/tERK ratio, with tERK staining  
264 used to normalize staining intensity across animals. The resulting Cx36 expression map reveals  
265 decreases in Cx36 staining intensity in *cx35.5*<sup>-/-</sup> fish compared to wild-type siblings in regions  
266 such as the optic tectum, rhombomeres, mauthner cells, etc. (Figure 3C). See Supplementary  
267 Table 2 for a complete list of regional changes. We then applied this same method to examine  
268 Cx36 expression after PTZ.

### 269 **Reduced Cx36 expression following PTZ exposure**

270 Next, to determine if exposure to PTZ changes Cx36 expression, we compared the Cx36  
271 expression map between treated animals and untreated animals exposed to 20 mM PTZ for 30  
272 minutes or 1 hour. After 30 minutes of PTZ exposure, we found a global decrease in Cx36  
273 fluorescence (Figure 4A). A similar but more pronounced effect was observed after 1 hour (Figure  
274 4B). We saw decreases in Cx36 expression in the optic tectum, the retinal arborization fields, and  
275 in the rhombencephalon in rhombomere 7, an area that is important for motor behavior (Figure

276 4A, B). After 1 hour of PTZ, there was also a decrease in expression within the cerebellum (Figure  
277 4B), an area that relies heavily on Cx36 for synchronous firing. For a complete list of ROIs with  
278 changes, see Supplementary Table 2. Together, these data reveal that Cx36 expression is  
279 reduced following exposure to PTZ after 30 minutes, and this is exacerbated after 1 hour of  
280 exposure.

### 281 **Recovery of Cx36 expression following cessation of PTZ exposure**

282 To test whether Cx36 expression recovers after the removal of PTZ, we created Cx36  
283 expression maps for animals exposed to 20 mM PTZ for one hour and then allowed them to  
284 recover in embryo media for 1, 3, 6, or 24 hours after PTZ removal. Compared to animals not  
285 exposed to PTZ, Cx36 expression was still significantly decreased in the pallium, habenula,  
286 subpallium, and the pretectum after 1 hour of recovery, but there were some increases in  
287 expression in restricted areas in the rhombencephalon (Figure 4C). The decrease in Cx36  
288 expression was almost entirely recovered after 3 hours (Figure 4D). Interestingly, expression is  
289 then slightly increased by 6 hours of recovery in the optic tectum, neuropil, and the cerebellum  
290 (Figure 4E). This is maintained 24 hours later (Figure 4F). For a complete list of regions that show  
291 changes in expression, see Supplementary Table 2. These alterations in expression were not due  
292 to cell death resulting from long-term PTZ exposure as no significant differences in the number of  
293 caspase-3 positive cells in between untreated (media only) versus those treated with 20 mM PTZ  
294 for one hour (Fig. 4G) we detected.

### 295 **Acute blockade of Cx36 increases neuronal hyperactivity following PTZ exposure**

296 Given that PTZ-induced neuronal hyperactivity resulted in decreased Cx36 expression,  
297 we next tested whether the acute reduction of Cx36 contributes to further susceptibility to neuronal  
298 hyperactivation, i.e., whether PTZ-induced Cx36 reduction is maladaptive. To acutely inhibit Cx36  
299 function, we utilized a Cx36-specific blocking drug, mefloquine, and examined changes in

300 neuronal activity. The effects of mefloquine were assessed by comparing the activity maps of  
301 wild-type fish treated with DMSO (vehicle) or 25  $\mu$ M mefloquine for 3 hours before the experiment,  
302 with or without varying concentrations of PTZ. Similar to our wild-type activity mapping (Figure  
303 1A-D), we observed broad increases in neuronal activity in DMSO treated animals following  
304 exposure to PTZ in a dose-dependent manner (Figure 5A-D), but these increases were greater  
305 than our wild-type treated control (Figure 1A-D). At 2 mM PTZ, we saw increases in activity in the  
306 optic tectum, neuropil, cerebellum, pallium, and hypothalamus. There were also decreases in  
307 activity in the olfactory bulb (Figure 5A). At 5 mM PTZ, we found increases in activity in similar  
308 regions as well as the retinal arborization fields and decreases in the olfactory bulb (Figure 5B).  
309 At 10 mM we observed increases in similar regions, with greater increases seen in the  
310 hypothalamus, decreases in the olfactory system and, small decreases in the hypothalamus and  
311 pallium (Figure 5C). Finally, at 20 mM PTZ increases in neuronal activity in similar regions as the  
312 previous doses were observed, with the greatest increases seen in the hypothalamus. Decreases  
313 in the olfactory system, hypothalamus, and pallium (Figure 5D) were also observed. In fish treated  
314 with mefloquine, we found very similar overall patterns as the DMSO treated fish (Figure 5A-D),  
315 but at each dose, we saw increases in the hypothalamus, preoptic area and subpallium, and fewer  
316 decreases within the forebrain (Figure 5E-H).

317         Next, we compared mefloquine versus DMSO treated siblings at different concentrations  
318 of PTZ. In the absence of PTZ, the mefloquine treated fish showed increases and decreases in  
319 neuronal activity in different brain regions, compared to DMSO treated siblings (Fig. 5I).  
320 Specifically, we saw moderate increases in the hypothalamus, cerebellum, and tegmentum. There  
321 were decreases in activity in the olfactory bulb and we observed less of an increase in activity  
322 compared to control in the telencephalon, specifically in the subpallium (Figure 5I). At 2 mM PTZ,  
323 mefloquine treated fish showed increases in the major regions associated with PTZ exposure  
324 (Figure 1A), compared to DMSO treated fish. Increases in the hypothalamus, retinal arborization

325 fields, pre-tectum, and subpallium were found. There were decreases in the olfactory bulb and  
326 less of an increase in other regions of the telencephalon (Figure 5J) compared to control. At 5  
327 mM PTZ, we found similar regions of increased activity in mefloquine treated fish, but we also  
328 saw regions that showed less of an increase in activity compared to control within both the  
329 telencephalon and the rhombencephalon (Figure 5K), specifically in regions that had high Cx36  
330 expression (Figure 3C). At 10 and 20 mM PTZ, we observed similar increases in activity in  
331 mefloquine treated fish, each increasing with PTZ dose, and less of an increase in activity  
332 compared to control in the telencephalon, that was less severe than 10 mM, in these two groups  
333 (Figure 5L-M). At 20 mM we observed less of an increase in activity in the hypothalamus and  
334 oculomotor nuclei compared to wild-type, which was not observed in other doses (Figure 5M).  
335 The activity increases we found in the drug-treated animals are more wide-spread than in the  
336 *cx35.5* *-/-* (Figure 1I-M), but similar regions were affected. These results indicate that acute  
337 reduction of Cx36 functionality results in increased susceptibility to PTZ-induced neuronal  
338 hyperactivity. For a complete list of regions changed, see Supplementary Table 3.

339 Finally, to test whether or not the increases in neuronal activity that we observed in  
340 mefloquine treated fish compared to *cx35.5* *-/-* fish were due to mefloquine's off-target effects, we  
341 examined effects of mefloquine on *cx35.5* *-/-* fish, with and without PTZ. We compared the  
342 differences in neuronal activity in mefloquine treated and DMSO treated *cx35.5* *-/-* fish, with either  
343 no PTZ (embryo media only) or a moderate PTZ dose (5 mM PTZ) (Supplementary Figure 1). In  
344 both the embryo media and 5 mM PTZ conditions, we observed increases in neuronal activity  
345 following the administration of mefloquine in a small region of the rhombencephalon (area  
346 postrema, neuropil, rhombomere 7). We observed slight decreases in neuronal activity within the  
347 forebrain (in regions olfactory bulb, subpallium, pallium) within the diencephalon (habenula, retinal  
348 arborization fields) and within the rhombencephalon (inferior olive). These changes in neuronal  
349 activity are Cx36-independent and are likely off-target effects. This indicates that, less the off-

350 target effects on neuronal activity we identified in *cx35.5*<sup>-/-</sup> animals (Supplementary Figure 1), the  
351 increases in activity we observed in the mefloquine treated fish (hypothalamus, retinal arborization  
352 fields, pre-tectum, and subpallium (Figure 5K) are likely due to true increases in activity following  
353 only acute blockade of Cx36. For a complete list of regions changed, see Supplementary Table  
354 4.

## 355 **DISCUSSION**

356 The goal of this study was to understand the reciprocal relationship between Cx36 and  
357 neuronal hyperactivity on a brain-wide scale. We utilized MAP-mapping to quantify neuronal  
358 activity and protein expression across the *whole-brain*, which has not been possible using other  
359 models. Through this, we characterized the complex nature of this relationship and its  
360 dependence on many factors including brain region, drug dose, and exposure time. We found  
361 that chronic deficiency of the Cx36 protein in the *cx35.5* mutants altered susceptibility to PTZ-  
362 induced neuronal hyperactivity in a region-specific manner. We also developed a whole-brain  
363 quantification method for Cx36 expression and found that PTZ exposure results in an acute  
364 decrease in the expression of Cx36, followed by recovery and overexpression of the protein.  
365 Finally, we observed that acute knockdown of the functionality of Cx36 by mefloquine resulted in  
366 a broad increase in the susceptibility to PTZ induced hyperactivity. Taken together, these results  
367 suggest that Cx36 acts to prevent hyperactivity within the brain, and that loss of Cx36 protein,  
368 both acute (perhaps due to previous hyperactivity) and chronic, results in an increase in  
369 susceptibility to hyperactivity. As such, preservation of Cx36 expression may serve as a viable  
370 therapeutic target in the treatment of diseases such as epilepsy.

### 371 **PTZ exerts brain-wide and region-specific effects**

372 We generated dose-varying whole-brain activity maps for PTZ in *cx35.5*<sup>-/-</sup> and wild-type  
373 fish. Using the zebrafish model we discovered regions affected by PTZ that were not examined



374 in previous studies. This is important because previous studies in mammalian systems were  
375 restricted to the hippocampus. Only 60% of epilepsy cases are characterized by hippocampal  
376 sclerosis, with 0.003% of those patients suffering from drug-resistant epilepsy (Asadi-Pooya,  
377 Stewart, Abrams, & Sharan, 2017). In all forms of epilepsy, however, approximately 30% of cases  
378 are drug-resistant (Kwan & Brodie, 2000). It is therefore imperative to look beyond the  
379 hippocampus to address this unmet need.

380 We did see a slight increase in activity in the pallium at all concentrations of PTZ  
381 (analogous to the hippocampus) (Cheng, Jesuthasan, & Penney, 2014) (Figure 1), but it was not  
382 the largest increase we observed. We showed a dose-varying dependent increase in activity after  
383 administration of PTZ (Figure 1) with larger increases in regions associated with hormone release,  
384 and production, as well as executive functioning. These results stress the lack of generalizability  
385 of results across brain regions, and the need for expanded inquiry when examining neuronal  
386 hyperactivity.

387 While we were able to examine a greater number of brain regions than previous studies,  
388 we sacrificed temporal resolution (achieved with Ca<sup>2+</sup> imaging and EEG). However, these results  
389 can be used to inform which brain regions should be investigated using methods that allow for  
390 greater temporal resolution. In addition to discovering new brain regions affected by PTZ, we were  
391 able to elucidate the dose-varying effects of PTZ in a way that was previously unachievable by  
392 examining the whole brain. Previous studies, using live calcium imaging, observed increases in  
393 neuronal activity and synchronicity after PTZ administration, with differential recruitment of  
394 different brain regions (Diaz Verdugo et al., 2019; Liu & Baraban, 2019). They observed increases  
395 in neuronal activity originating in the pallium and traveling to the hindbrain (Liu & Baraban, 2019).  
396 Additionally, they observed significant increases in neuronal connectivity in each of the regions  
397 observed (Diaz Verdugo et al., 2019). Our results show similar effects of PTZ on brain activity in  
398 similar regions, but we were able to identify additional brain regions than was previously possible

399 (Diaz Verdugo et al., 2019; Liu & Baraban, 2019). This demonstrates the importance of identifying  
400 brain-wide region-specific effects when examining hyperactivity. Taken together, these results  
401 illustrate the unique dose-varying whole-brain effects of PTZ that can be expanded upon in future  
402 work.

### 403 **Cx36 knockdown causes region-specific changes in hyperactivity following PTZ** 404 **administration**

405 In addition to characterizing the effect of PTZ on whole-brain activity in wild-type animals,  
406 we gained insight into the drug's effects in *cx35.5*<sup>-/-</sup> zebrafish. We found neuronal activity  
407 differences in *cx35.5*<sup>-/-</sup> compared to wild-type following high concentrations of PTZ (Figure 1).  
408 We saw increases in regions identified in our PTZ dose-response experiment, indicating more  
409 severe increases in neuronal hyperactivity following the administration of PTZ in those regions  
410 (Figure 1). These results are consistent with previous behavior work by Jacobson, et. al, 2010,  
411 which showed that in Cx36 mutant mice, PTZ administration resulted in more severe seizure-  
412 associated behaviors than their wild-type counterparts (Jacobson et al., 2010), but also provides  
413 more information relating to the severity of neuronal hyperactivity. In addition to activity increases,  
414 we observed significant decreases in neuronal activity at 10mM PTZ concentrations. These  
415 decreases were observed in the rhombencephalon, specifically in regions that show high Cx36  
416 expression (Figure 3A) and rely on Cx36 for synchronous firing (inferior olive, Mauthner cells)  
417 (Bazzigaluppi et al., 2017; Flores et al., 2012; Yao et al., 2014). These results are important, as it  
418 is the first study to show regional differences in neuronal activity between Cx36-deficient and wild-  
419 type animals, which indicates the lack of generalizability from region to region within the brain  
420 when examining connexin proteins.

### 421 **PTZ induced hyperactivity causes a regionally-specific decrease in Cx36 expression**

422 To further understand the relationship between Cx36 and hyperactivity, we asked the  
423 reciprocal question: how does hyperactivity affect Cx36? Similar to the seizure susceptibility  
424 studies, work to identify this relationship has remained conflicting (Laura et al., 2015; Motaghi et  
425 al., 2017; Söhl et al., 2000; X. Wu et al., 2017). Previous approaches used to address this question  
426 (e.g., qPCR, western blot) lacked the necessary spatial resolution to determine if the effects of  
427 hyperactivity on Cx36 vary based on the brain region. To address these shortcomings, we  
428 developed a novel method for quantifying the whole-brain expression of the Cx36 protein, using  
429 antibody staining in conjunction with a modified MAP-mapping technique (Figure 3). We were,  
430 therefore, able to determine that there are regional and exposure time differences in the reduction  
431 of Cx36 in response to seizure induction using PTZ. Specifically, we saw reductions in a region-  
432 specific manner after exposure to PTZ for 30 minutes, and those reductions were greater after 1  
433 hour of PTZ exposure (Figure 4). Therefore, we have determined that results found in one region  
434 of the brain and that PTZ exerts region-specific effects on Cx36.

#### 435 **Reduction in Cx36 expression following hyperactivity is acute and recovers over time**

436 After observing a decrease in Cx36 expression following exposure to PTZ, we measured  
437 the temporal patterns of this change. We found that the change in Cx36 expression was acute: it  
438 occurred within the first hour of PTZ exposure and was almost fully recovered by 3 hours (Figure  
439 4C-D). The recovery was then overshoot, and the protein was overexpressed in the optic tectum  
440 and cerebellum as well as other brain regions, and this overexpression was maintained 24 hours  
441 later (Figure 4E-F). Because the reduction was not caused by an increase in cell death (Figure  
442 4G), this effect is likely due to an increase in endocytosis and degradation of the Cx36 protein.  
443 Various studies have shown that activity-dependent modulation of Cx36 proteins exists (Haas,  
444 Greenwald, & Pereda, 2016; Smith & Pereda, 2003) and endocytosis is a likely mechanism by  
445 which this can occur (Flores et al., 2012).

446 **Acute reduction in Cx36 functionality leaves organisms more susceptible to PTZ induced**  
447 **hyperactivity**

448 To solidify the relationship between hyperactivity and Cx36, we studied how acute  
449 blockade of Cx36 affects susceptibility to hyperactivity. Is the reduction in Cx36 after PTZ  
450 exposure adaptive, maladaptive, or inconsequential? To answer this question, we utilized the  
451 Cx36 specific blocking drug mefloquine and expose mefloquine treated and untreated fish to PTZ  
452 to observe differences. Mefloquine is an anti-malarial drug that selectively blocks Cx36 and Cx50.  
453 Previous studies utilized quinine which has more off-target effects. It is hypothesized that  
454 mefloquine blocks Cx36 by binding to the inside of the pore, preventing the flow of ions through  
455 that pore (Harris & Locke, 2008). We found a significant increase in neuronal hyperactivity  
456 following treatment with PTZ in the mefloquine treated fish compared to control (Figure 4). This  
457 result indicates a reduction in Cx36 in all cases (acute and chronic) is detrimental and leads to an  
458 altered severity of hyperactivity.

459 At moderate doses (6-25  $\mu$ M), mefloquine can exhibit off-target effects of varying degrees  
460 (Caridha et al., 2008; Harris & Locke, 2008; McArdle, Sellin, Coakley, Potian, & Hognason, 2006).  
461 To control for off-target effects of mefloquine, we treated *cx35.5*<sup>-/-</sup> fish with mefloquine and  
462 quantified changes in neuronal activity both at rest (in embryo medium) and after PTZ (5 mM).  
463 We observed major decreases in neuronal activity within the forebrain and a slight decrease in  
464 the rhombencephalon in both conditions. Additionally, we observed a slight increase in neuronal  
465 activity in the rhombencephalon which was exacerbated slightly by PTZ (Supplementary Figure  
466 1). We attribute these effects to off-target effects of mefloquine, while the changes in PTZ  
467 sensitivity caused by mefloquine in other ideas are more likely to be caused by Cx36 blockade.

468 The increase in neuronal hyperactivity following treatment with PTZ in the mefloquine  
469 treated fish compared to control (Figure 4) is greater than the *cx35.5*<sup>-/-</sup> to wild-type comparison  
470 (Figure 1). This may be due to genetic compensation in the *cx35.5* mutants resulting from the lack

471 of Cx36 from birth. It is also possible that acute reduction of Cx36 is more detrimental than chronic  
472 knock down, meaning the acute reduction in Cx36 expression after hyperactivity, would be more  
473 detrimental than chronic knock-down. This difference may then also account for conflicting  
474 evidence in the field comparing chronic and acute knockdown of Cx36 (Gajda et al., 2005;  
475 Jacobson et al., 2010; Voss et al., 2010b). Taken together, these results suggest that the  
476 prevention of the loss of Cx36 function may prove to be a useful target for treating diseases of  
477 hyperactivity.

### 478 **Cx36 is a contributing factor regulating the brains response to hyperactivity**

479 A plausible clinical application of Cx36-targeted therapeutics is in Juvenile Myoclonic  
480 Epilepsy (JME). Individuals with JME have a higher likelihood of harboring a specific intronic  
481 SNP in the Cx36 gene (Hempelmann, Heils, & Sander, 2006; Mas et al., 2004). This SNP has  
482 been hypothesized to affect splicing enhancers of the gene, therefore affecting the translation of  
483 the protein (Mas et al., 2004). While Cx36 may not be the only cause for diseases like JME, it  
484 may be a contributing factor. Based on our results, loss of Cx36 makes an individual more  
485 susceptible to other factors leading to hyperactivity, increasing the severity of hyperactivity (Figure  
486 1, 6), therefore, the rescue of Cx36 expression may reduce the severity of hyperactivity. This is  
487 particularly relevant as Cx36 expression is highest during development and decreases over time  
488 (Belousov & Fontes, 2013) and JME first appears in children and adolescents. This is clinically  
489 relevant as approximately 15% of cases of JME are drug-resistant, with no known  
490 pharmacotherapy (Martin et al., 2019).

491 Our work demonstrates that Cx36 is an important factor preventing hyperactivity in the  
492 brain and that loss of the protein is detrimental to that process. We were able to determine where  
493 in the brain we see effects in addition to when those changes occur. This work provides a basis  
494 for better understanding the dynamics of Cx36 and hyperactivity.

495 **REFERENCES**

- 496 Afrikanova, T., Serruys, A.-S. K., Buenafe, O. E. M., Clinckers, R., Smolders, I., de Witte, P. A.  
497 M., ... Esguerra, C. V. (2013). Validation of the Zebrafish Pentylenetetrazol Seizure Model:  
498 Locomotor versus Electrographic Responses to Antiepileptic Drugs. *PLoS ONE*, 8(1),  
499 e54166. <https://doi.org/10.1371/journal.pone.0054166>
- 500 Allen, K., Fuchs, E. C., Jaschonek, H., Bannerman, D. M., & Monyer, H. (2011). Gap junctions  
501 between interneurons are required for normal spatial coding in the hippocampus and short-  
502 term spatial memory. *Journal of Neuroscience*, 31(17), 6542–6552.  
503 <https://doi.org/10.1523/JNEUROSCI.6512-10.2011>
- 504 Asadi-Pooya, A. A., Stewart, G. R., Abrams, D. J., & Sharan, A. (2017, March 1). Prevalence  
505 and Incidence of Drug-Resistant Mesial Temporal Lobe Epilepsy in the United States.  
506 *World Neurosurgery*. Elsevier Inc. <https://doi.org/10.1016/j.wneu.2016.12.074>
- 507 Baraban, S.C., Taylor, M. R., Castro, P. A., & Baier, H. (2005). Pentylenetetrazole induced  
508 changes in zebrafish behavior, neural activity and c-fos expression. *Neuroscience*, 131(3),  
509 759–768. <https://doi.org/10.1016/J.NEUROSCIENCE.2004.11.031>
- 510 Baraban, Scott C., Dinday, M. T., & Hortopan, G. A. (2013). Drug screening in Scn1a zebrafish  
511 mutant identifies clemizole as a potential Dravet syndrome treatment. *Nature*  
512 *Communications*, 4(1), 2410. <https://doi.org/10.1038/ncomms3410>
- 513 Bazzigaluppi, P., Isenia, S. C., Haasdijk, E. D., Elgersma, Y., De Zeeuw, C. I., van der Giessen,  
514 R. S., & de Jeu, M. T. G. (2017). Modulation of Murine Olivary Connexin 36 Gap Junctions  
515 by PKA and CaMKII. *Frontiers in Cellular Neuroscience*, 11, 397.  
516 <https://doi.org/10.3389/fncel.2017.00397>
- 517 Belousov, A. B., & Fontes, J. D. (2013). Neuronal gap junctions: making and breaking

- 518 connections during development and injury. *Trends in Neurosciences*, 36(4), 227–236.  
519 <https://doi.org/10.1016/j.tins.2012.11.001>
- 520 Burrows, D. R. W., Samarut, Liu, J., Baraban, S. C., Richardson, M. P., Meyer, M. P., & Rosch,  
521 R. E. (2020, January 1). Imaging epilepsy in larval zebrafish. *European Journal of*  
522 *Paediatric Neurology*. W.B. Saunders Ltd. <https://doi.org/10.1016/j.ejpn.2020.01.006>
- 523 Caridha, D., Yourick, D., Cabezas, M., Wolf, L., Hudson, T. H., & Dow, G. S. (2008).  
524 Mefloquine-Induced Disruption of Calcium Homeostasis in Mammalian Cells Is Similar to  
525 That Induced by Ionomycin Downloaded from. *ANTIMICROBIAL AGENTS AND*  
526 *CHEMOTHERAPY*, 52(2), 684–693. <https://doi.org/10.1128/AAC.00874-07>
- 527 Cheng, R. K., Jesuthasan, S. J., & Penney, T. B. (2014, March 5). Zebrafish forebrain and  
528 temporal conditioning. *Philosophical Transactions of the Royal Society B: Biological*  
529 *Sciences*. The Royal Society. <https://doi.org/10.1098/rstb.2012.0462>
- 530 Collignon, F., Wetjen, N. M., Cohen-Gadol, A. A., Cascino, G. D., Parisi, J., Meyer, F. B., ...  
531 Weigand, S. D. (2006). Altered expression of connexin subtypes in mesial temporal lobe  
532 epilepsy in humans. *Journal of Neurosurgery*, 105(1), 77–87.  
533 <https://doi.org/10.3171/jns.2006.105.1.77>
- 534 Condorelli, D. F., Trovato-Salinaro, A., Mudo, G., Mirone, M. B., & Belluardo, N. (2003). Cellular  
535 expression of connexins in the rat brain: neuronal localization, effects of kainate-induced  
536 seizures and expression in apoptotic neuronal cells. *European Journal of Neuroscience*,  
537 18(7), 1807–1827. <https://doi.org/10.1046/j.1460-9568.2003.02910.x>
- 538 Copmans, D., Siekierska, A., & de Witte, P. A. M. (2017). Zebrafish Models of Epilepsy and  
539 Epileptic Seizures. In *Models of Seizures and Epilepsy: Second Edition* (pp. 369–384).  
540 Elsevier Inc. <https://doi.org/10.1016/B978-0-12-804066-9.00026-2>

- 541 Cruikshank, S. J., Hopperstad, M., Younger, M., Connors, B. W., Spray, D. C., & Srinivas, M.  
542 (2004). *Potent block of Cx36 and Cx50 gap junction channels by mefloquine*. Retrieved  
543 from [www.pnas.org/cgi/doi/10.1073/pnas.0402044101](http://www.pnas.org/cgi/doi/10.1073/pnas.0402044101)
- 544 Diaz Verdugo, C., Myren-Svelstad, S., Aydin, E., Van Hoeymissen, E., Deneubourg, C.,  
545 Vanderhaeghe, S., ... Yaksi, E. (2019). Glia-neuron interactions underlie state transitions  
546 to generalized seizures. *Nature Communications*, *10*(1), 1–13.  
547 <https://doi.org/10.1038/s41467-019-11739-z>
- 548 Flores, C. E., Nannapaneni, S., Davidson, K. G. V., Yasumura, T., Bennett, M. V. L., Rash, J.  
549 E., & Pereda, A. E. (2012). Trafficking of gap junction channels at a vertebrate electrical  
550 synapse in vivo. *Proceedings of the National Academy of Sciences*, *109*(9), E573–E582.  
551 <https://doi.org/10.1073/pnas.1121557109>
- 552 Gajda, Z., Szupera, Z., Blazsó, G., & Szente, M. (2005). Quinine, a Blocker of Neuronal Cx36  
553 Channels, Suppresses Seizure Activity in Rat Neocortex In Vivo. *Epilepsia*, *46*(10), 1581–  
554 1591. Retrieved from  
555 [https://s3.amazonaws.com/objects.readcube.com/articles/downloaded/wiley/94cebc1e11a9](https://s3.amazonaws.com/objects.readcube.com/articles/downloaded/wiley/94cebc1e11a9dc9bdbfd8c0e7826390905ed9531776beba8cff9957776fd8406.pdf?X-Amz-Algorithm=AWS4-HMAC-SHA256&X-Amz-Credential=AKIAIS5LBPCM5JPOCDGQ%2F20180319%2Fus-east-1%2Fs3%2Faws4_request&)  
556 [dc9bdbfd8c0e7826390905ed9531776beba8cff9957776fd8406.pdf?X-Amz-](https://s3.amazonaws.com/objects.readcube.com/articles/downloaded/wiley/94cebc1e11a9dc9bdbfd8c0e7826390905ed9531776beba8cff9957776fd8406.pdf?X-Amz-Algorithm=AWS4-HMAC-SHA256&X-Amz-Credential=AKIAIS5LBPCM5JPOCDGQ%2F20180319%2Fus-east-1%2Fs3%2Faws4_request&)  
557 [Algorithm=AWS4-HMAC-SHA256&X-Amz-](https://s3.amazonaws.com/objects.readcube.com/articles/downloaded/wiley/94cebc1e11a9dc9bdbfd8c0e7826390905ed9531776beba8cff9957776fd8406.pdf?X-Amz-Algorithm=AWS4-HMAC-SHA256&X-Amz-Credential=AKIAIS5LBPCM5JPOCDGQ%2F20180319%2Fus-east-1%2Fs3%2Faws4_request&)  
558 [Credential=AKIAIS5LBPCM5JPOCDGQ%2F20180319%2Fus-east-](https://s3.amazonaws.com/objects.readcube.com/articles/downloaded/wiley/94cebc1e11a9dc9bdbfd8c0e7826390905ed9531776beba8cff9957776fd8406.pdf?X-Amz-Algorithm=AWS4-HMAC-SHA256&X-Amz-Credential=AKIAIS5LBPCM5JPOCDGQ%2F20180319%2Fus-east-1%2Fs3%2Faws4_request&)  
559 [1%2Fs3%2Faws4\\_request&](https://s3.amazonaws.com/objects.readcube.com/articles/downloaded/wiley/94cebc1e11a9dc9bdbfd8c0e7826390905ed9531776beba8cff9957776fd8406.pdf?X-Amz-Algorithm=AWS4-HMAC-SHA256&X-Amz-Credential=AKIAIS5LBPCM5JPOCDGQ%2F20180319%2Fus-east-1%2Fs3%2Faws4_request&)
- 560 Haas, J. S., Greenwald, C. M., & Pereda, A. E. (2016). Activity-dependent plasticity of electrical  
561 synapses: increasing evidence for its presence and functional roles in the mammalian  
562 brain. *BMC Cell Biology*, *17*(S1), 14. <https://doi.org/10.1186/s12860-016-0090-z>
- 563 Harris, A., & Locke, D. (Eds.). (2008). *Connexins: A Guide* (illustrate). New York, NY: Springer  
564 Science & Business Media.



- 565 Hempelmann, A., Heils, A., & Sander, T. (2006). Confirmatory evidence for an association of the  
566 connexin-36 gene with juvenile myoclonic epilepsy. *Epilepsy Research*, *71*(2–3), 223–228.  
567 <https://doi.org/10.1016/J.EPLEPSYRES.2006.06.021>
- 568 Jacobson, G. M., Voss, L. J., Melin, S. M., Mason, J. P., Cursons, R. T., Steyn-Ross, D. A., ...  
569 Sleigh, J. W. (2010). Connexin36 knockout mice display increased sensitivity to  
570 pentylenetetrazol-induced seizure-like behaviors. *Brain Research*, *1360*, 198–204.  
571 <https://doi.org/10.1016/J.BRAINRES.2010.09.006>
- 572 Kovács-Öller, T., Debertin, G., Balogh, M., Ganczer, A., Orbán, J., Nyitrai, M., ... Völgyi, B.  
573 (2017). Connexin36 Expression in the Mammalian Retina: A Multiple-Species Comparison.  
574 *Frontiers in Cellular Neuroscience*, *11*, 65. <https://doi.org/10.3389/fncel.2017.00065>
- 575 Kwan, P., & Brodie, M. J. (2000). Early Identification of Refractory Epilepsy. *New England*  
576 *Journal of Medicine*, *342*(5), 314–319. <https://doi.org/10.1056/NEJM200002033420503>
- 577 Laura, M.-C., Xóchitl, F.-P., Anne, S., & Alberto, M.-V. (2015). Analysis of connexin expression  
578 during seizures induced by 4-aminopyridine in the rat hippocampus. *Journal of Biomedical*  
579 *Science*, *22*(1), 69. <https://doi.org/10.1186/s12929-015-0176-5>
- 580 Liu, J., & Baraban, S. C. (2019). Network Properties Revealed during Multi-Scale Calcium  
581 Imaging of Seizure Activity in Zebrafish. *Eneuro*, *6*(1), ENEURO.0041-19.2019.  
582 <https://doi.org/10.1523/ENEURO.0041-19.2019>
- 583 Maack, G., & Segner, H. (2003). Morphological development of the gonads in zebrafish. *Journal*  
584 *of Fish Biology*, *62*(4), 895–906. <https://doi.org/10.1046/j.1095-8649.2003.00074.x>
- 585 Manjarrez-Marmolejo, J., & Franco-Pérez, J. (2016). Gap Junction Blockers: An Overview of  
586 their Effects on Induced Seizures in Animal Models. *Current Neuropharmacology*, *14*(7),  
587 759–771. <https://doi.org/10.2174/1570159x14666160603115942>

- 588 Marsh, A. J., Michel, J. C., Adke, A. P., Heckman, E. L., & Miller, A. C. (2017). Asymmetry of an  
589 Intracellular Scaffold at Vertebrate Electrical Synapses. *Current Biology*, 27(22), 3561-  
590 3567.e4. <https://doi.org/10.1016/J.CUB.2017.10.011>
- 591 Martin, S., Strzelczyk, A., Lindlar, S., Krause, K., Reif, P. S., Menzler, K., ... Klein, K. M. (2019).  
592 Drug-Resistant Juvenile Myoclonic Epilepsy: Misdiagnosis of Progressive Myoclonus  
593 Epilepsy. *Frontiers in Neurology*, 10. <https://doi.org/10.3389/fneur.2019.00946>
- 594 Mas, C., Taske, N., Deutsch, S., Guipponi, M., Thomas, P., Covanis, A., ... Meda, P. (2004).  
595 Association of the connexin36 gene with juvenile myoclonic epilepsy. *J Med Genet*, 41.  
596 <https://doi.org/10.1136/jmg.2003.017954>
- 597 McArdle, J. J., Sellin, L. C., Coakley, K. M., Potian, J. G., & Hognason, K. (2006). Mefloquine  
598 selectively increases asynchronous acetylcholine release from motor nerve terminals.  
599 *Neuropharmacology*, 50(3), 345–353. <https://doi.org/10.1016/j.neuropharm.2005.09.011>
- 600 Miller, A. C., Whitebirch, A. C., Shah, A. N., Marsden, K. C., Granato, M., O'Brien, J., & Moens,  
601 C. B. (2017). A genetic basis for molecular asymmetry at vertebrate electrical synapses.  
602 *ELife*, 6. <https://doi.org/10.7554/eLife.25364>
- 603 Morgan, V. L., Gore, J. C., & Abou-Khalil, B. (2010). Functional epileptic network in left mesial  
604 temporal lobe epilepsy detected using resting fMRI. *Epilepsy Research*, 88(2–3), 168–178.  
605 <https://doi.org/10.1016/j.eplepsyres.2009.10.018>
- 606 Motaghi, S., Sayyah, M., Babapour, V., & Mahdian, R. (2017). Hippocampal Expression of  
607 Connexin36 and Connexin43 during Epileptogenesis in Pilocarpine Model of Epilepsy.  
608 *Iranian Biomedical Journal*, 21(3), 167–173.  
609 <https://doi.org/10.18869/ACADPUB.IBJ.21.3.167>
- 610 Randlett, O., Wee, C. L., Naumann, E. A., Nnaemeka, O., Schoppik, D., Fitzgerald, J. E., ...

- 611 Schier, A. F. (2015). Whole-brain activity mapping onto a zebrafish brain atlas. *Nature*  
612 *Methods*, 12(11), 1039–1046. <https://doi.org/10.1038/nmeth.3581>
- 613 Rash, J. E., Kamasawa, N., Davidson, K. G. V., Yasumura, T., Pereda, A. E., & Nagy, J. I.  
614 (2012). Connexin Composition in Apposed Gap Junction Hemiplaques Revealed by  
615 Matched Double-Replica Freeze-Fracture Replica Immunogold Labeling. *The Journal of*  
616 *Membrane Biology*, 245(5–6), 333–344. <https://doi.org/10.1007/s00232-012-9454-2>
- 617 Schindelin, J., Arganda-Carreras, I., Frise, E., Kaynig, V., Longair, M., Pietzsch, T., ... Cardona,  
618 A. (2012, July 28). Fiji: An open-source platform for biological-image analysis. *Nature*  
619 *Methods*. Nature Publishing Group. <https://doi.org/10.1038/nmeth.2019>
- 620 Shin, S. I. (2013). Connexin-36 Knock-Out Mice have Increased Threshold for Kindled Seizures:  
621 Role of GABA Inhibition. *Biochemistry & Pharmacology: Open Access*, S(1).  
622 <https://doi.org/10.4172/2167-0501.S1-006>
- 623 Smith, M., & Pereda, A. E. (2003). Chemical synaptic activity modulates nearby electrical  
624 synapses. *Proceedings of the National Academy of Sciences of the United States of*  
625 *America*, 100(8), 4849–4854. <https://doi.org/10.1073/pnas.0734299100>
- 626 Söhl, G., Güldenagel, M., Beck, H., Teubner, B., Traub, O., Gutiérrez, R., ... Willecke, K.  
627 (2000). Expression of connexin genes in hippocampus of kainate-treated and kindled rats  
628 under conditions of experimental epilepsy. *Molecular Brain Research*, 83(1–2), 44–51.  
629 [https://doi.org/10.1016/S0169-328X\(00\)00195-9](https://doi.org/10.1016/S0169-328X(00)00195-9)
- 630 Voss, L. J., Mutsaerts, N., & Sleight, J. W. (2010a). Connexin36 gap junction blockade is  
631 ineffective at reducing seizure-like event activity in neocortical mouse slices. *Epilepsy*  
632 *Research and Treatment*, 2010, 310753. <https://doi.org/10.1155/2010/310753>
- 633 Voss, L. J., Mutsaerts, N., & Sleight, J. W. (2010b). Connexin36 gap junction blockade is

- 634 ineffective at reducing seizure-like event activity in neocortical mouse slices. *Epilepsy*  
635 *Research and Treatment*, 2010, 310753. <https://doi.org/10.1155/2010/310753>
- 636 Wang, Y., & Belousov, A. B. (2011). Deletion of neuronal gap junction protein connexin 36  
637 impairs hippocampal LTP. *Neuroscience Letters*, 502(1), 30–32.  
638 <https://doi.org/10.1016/j.neulet.2011.07.018>
- 639 Wilson, C. A., High, S. K., McCluskey, B. M., Amores, A., Yan, Y. L., Titus, T. A., ...  
640 Postlethwait, J. H. (2014). Wild sex in zebrafish: Loss of the natural sex determinant in  
641 domesticated strains. *Genetics*, 198(3), 1291–1308.  
642 <https://doi.org/10.1534/genetics.114.169284>
- 643 Wu, X. L., Ma, D. M., Zhang, W., Zhou, J. S., Huo, Y. W., Lu, M., & Tang, F. R. (2018). Cx36 in  
644 the mouse hippocampus during and after pilocarpine-induced status epilepticus. *Epilepsy*  
645 *Research*, 141, 64–72. <https://doi.org/10.1016/J.EPLEPSYRES.2018.02.007>
- 646 Wu, X., Wang, G., Hao, X., & Feng, J. (2017). Dynamic expression of CX36 protein in kainic  
647 acid kindling induced epilepsy. *Translational Neuroscience*, 8(1), 31–36.  
648 <https://doi.org/10.1515/tnsci-2017-0007>
- 649 Yao, C., Vanderpool, K. G., Delfiner, M., Eddy, V., Lucaci, A. G., Soto-Riveros, C., ... Pereda,  
650 A. E. (2014). Electrical synaptic transmission in developing zebrafish: properties and  
651 molecular composition of gap junctions at a central auditory synapse. *Journal of*  
652 *Neurophysiology*, 112(9), 2102–2113. <https://doi.org/10.1152/jn.00397.2014>
- 653

654 **Figure Legends**

655 **Figure 1. Whole-brain activity map showing significant regional differences in**  
656 **neuronal activity following various PTZ concentration exposure in wild-type and**  
657 **cx35.5<sup>-/-</sup> zebrafish larvae.** Dorsal and lateral view of zebrafish larvae brain. Colors  
658 indicate ROIs with higher pERK/tERK ratio in wild-type PTZ treated (green) or in  
659 Embryo Media (magenta) in A) 2 mM PTZ treated (n=10) B) 5 mM PTZ treated (n=8) C)  
660 10 mM PTZ treated (n=10) and D) 20 mM PTZ treated (n=10) vs Embryo Media (n=10).  
661 Colors indicate ROIs with higher pERK/tERK ratio in cx35.5<sup>-/-</sup> larvae PTZ treated  
662 (green) or in Embryo Media (magenta) in E) 2 mM PTZ treated (n=9) F) 5mM PTZ  
663 treated (n=10) G) 10mM PTZ treated (n=11) and H) 20mM PTZ treated (n=10) vs  
664 Embryo Media (n=9). Colors indicate ROIs with higher pERK/tERK ratio in cx35.5<sup>-/-</sup>  
665 (green) or wild type (magenta) in I) E3 treated (WT n=10, MUT n=9) J) 2 mM PTZ  
666 treated (WT n=10, MUT n=9) K) 5 mM PTZ treated (WT n=8, MUT=10) L) 10 mM PTZ  
667 treated (WT n=10, MUT n=11) and M) 20 mM PTZ treated (WT n=10, MUT n=10)  
668 cx35.5<sup>-/-</sup> vs WT Images show pixels with significantly increased pERK/tERK ratio for  
669 treated fish (green) and untreated fish (magenta). For all regions  $p < 0.005$

670 **Figure 2. Caspase positive cells by major brain division, comparing cx35.5<sup>-/-</sup> vs**  
671 **wild type with and without PTZ.** Sum stack projections of all fish (Caspase-3 staining)  
672 A-D. A graph depicting the number of Caspase-3 positive cells in the Rhombencephalon,  
673 Mesencephalon, Telencephalon, and Diencephalon in wild-type (black) vs cx35.5<sup>-/-</sup> (red)  
674 fish with treatment with E) Embryo medium (Vehicle) or F) PTZ. Data were analyzed using  
675 a student's t-test with Welch's correction. Embryo medium (vehicle) treatment, wild type  
676 n=5, cx35.5<sup>-/-</sup> n= 10. PTZ treatment, wild type n= 6 cx35.5<sup>-/-</sup> n=8.

677 **Figure 3. Whole-brain expression map of *cx35.5*<sup>-/-</sup> vs wild-type zebrafish larvae**  
678 **immunostaining of anti-human Cx36.** Whole-brain expression of Cx36 using an anti-  
679 human Cx36 antibody vs tERK. Cyan indicates increases in fluorescence over tERK in  
680 *cx35.5*<sup>-/-</sup> fish, red indicates increases in fluorescence over tERK in wild-type fish A)  
681 Cx36 immunostaining of *cx35.5*<sup>-/-</sup> fish B) Cx36 immunostaining of wild-type fish C)  
682 Dorsal and lateral view of zebrafish larvae brain. Whole-brain expression map showing  
683 increased expression in *cx35.5*<sup>-/-</sup> (cyan) and increased expression in wild type (red).  
684 Wild type n=10, *cx35.5*<sup>-/-</sup> n=7 p<0.005)

685 **Figure 4. Wild type whole-brain immunostaining Cx36 expression map in E3 vs**  
686 **PTZ treated zebrafish larvae.** Dorsal and lateral view of zebrafish larvae brain. Whole-  
687 brain expression of Cx36 using an anti-human Cx36 antibody vs tERK. Cyan indicates  
688 increases in fluorescence over tERK in PTZ treated fish, red indicates increases in  
689 fluorescence over tERK in E3 treated fish A) After 30 min of 20 mM PTZ exposure  
690 (n=10) B) After 1 hr of 20 mM PTZ exposure (n=10) C) 1 hour recovery after PTZ is  
691 removed, n=12 D) 3 hours of recovery after PTZ is removed, n=12 E) 6 hours of  
692 recovery after PTZ is removed, n=12 F) 24 hours of recovery after PTZ is removed,  
693 n=10. For all regions p < 0.005 G) A graph depicting the number of Caspase-3 positive  
694 cells in the Rhombencephalon, Mesencephalon, Telencephalon, and Diencephalon in  
695 wild-type fish with treatment with embryo medium (Vehicle) (Black) or PTZ (Red). Data  
696 were analyzed using a student's t-test with Welch's correction, n=9.

697 **Figure 5. Whole-brain activity map showing significant regional differences**  
698 **following Connexin 36 blocking drug mefloquine and PTZ exposure in wild-type**  
699 **zebrafish larvae.** Dorsal and lateral view of zebrafish larvae brain. Images show pixels

700 with significantly increased pERK/tERK ratio compared to DMSO and embryo medium  
701 (n=9) for DMSO treated fish after A) 2 mM PTZ (n=10) ( B) 5 mM PTZ (n=10) C) 10 mM  
702 PTZ (n=10) and D) 20 mM PTZ (n=10). E-H) Images show pixels with significantly  
703 increased pERK/tERK ratio compared to mefloquine and embryo medium treated fish  
704 (n=9) after E) 2 mM n=10) PTZ F) 5 mM PTZ (n=8) G) 10 mM PTZ (n=10) and H) 20  
705 mM PTZ (n=10). I-M) Images show pixels with significantly increased pERK/tERK ratio  
706 for mefloquine (25  $\mu$ M) treated fish (green) and for DMSO (Vehicle) treated fish  
707 (magenta) after exposure to I) embryo medium (n=9) J) 2mM PTZ (n=10) K) 5 mM  
708 (DMSO n=10, mefloquine n=8) PTZ L) 10 mM PTZ (n=10) M) 20 mM PTZ (n=10). For  
709 all regions  $p < 0.005$

710 **Supplementary Figure 1. Whole-brain activity map showing off-target effects of**  
711 **mefloquine using *cx35.5*<sup>-/-</sup> treated with mefloquine.** Dorsal and lateral view of  
712 zebrafish larvae brain. Images show pixels with significantly increased pERK/tERK ratio  
713 in A) Embryo medium and mefloquine treated compared to DMSO treated larvae.  
714 (*cx35.5*<sup>-/-</sup> mefloquine n=9, *cx35.5*<sup>-/-</sup> DMSO n=11) and B) 5 mM PTZ and mefloquine  
715 treated compared to DMSO treated larvae (*cx35.5*<sup>-/-</sup> mefloquine n=11 , *cx35.5*<sup>-/-</sup> DMSO  
716 n=11). For all regions  $p < 0.005$

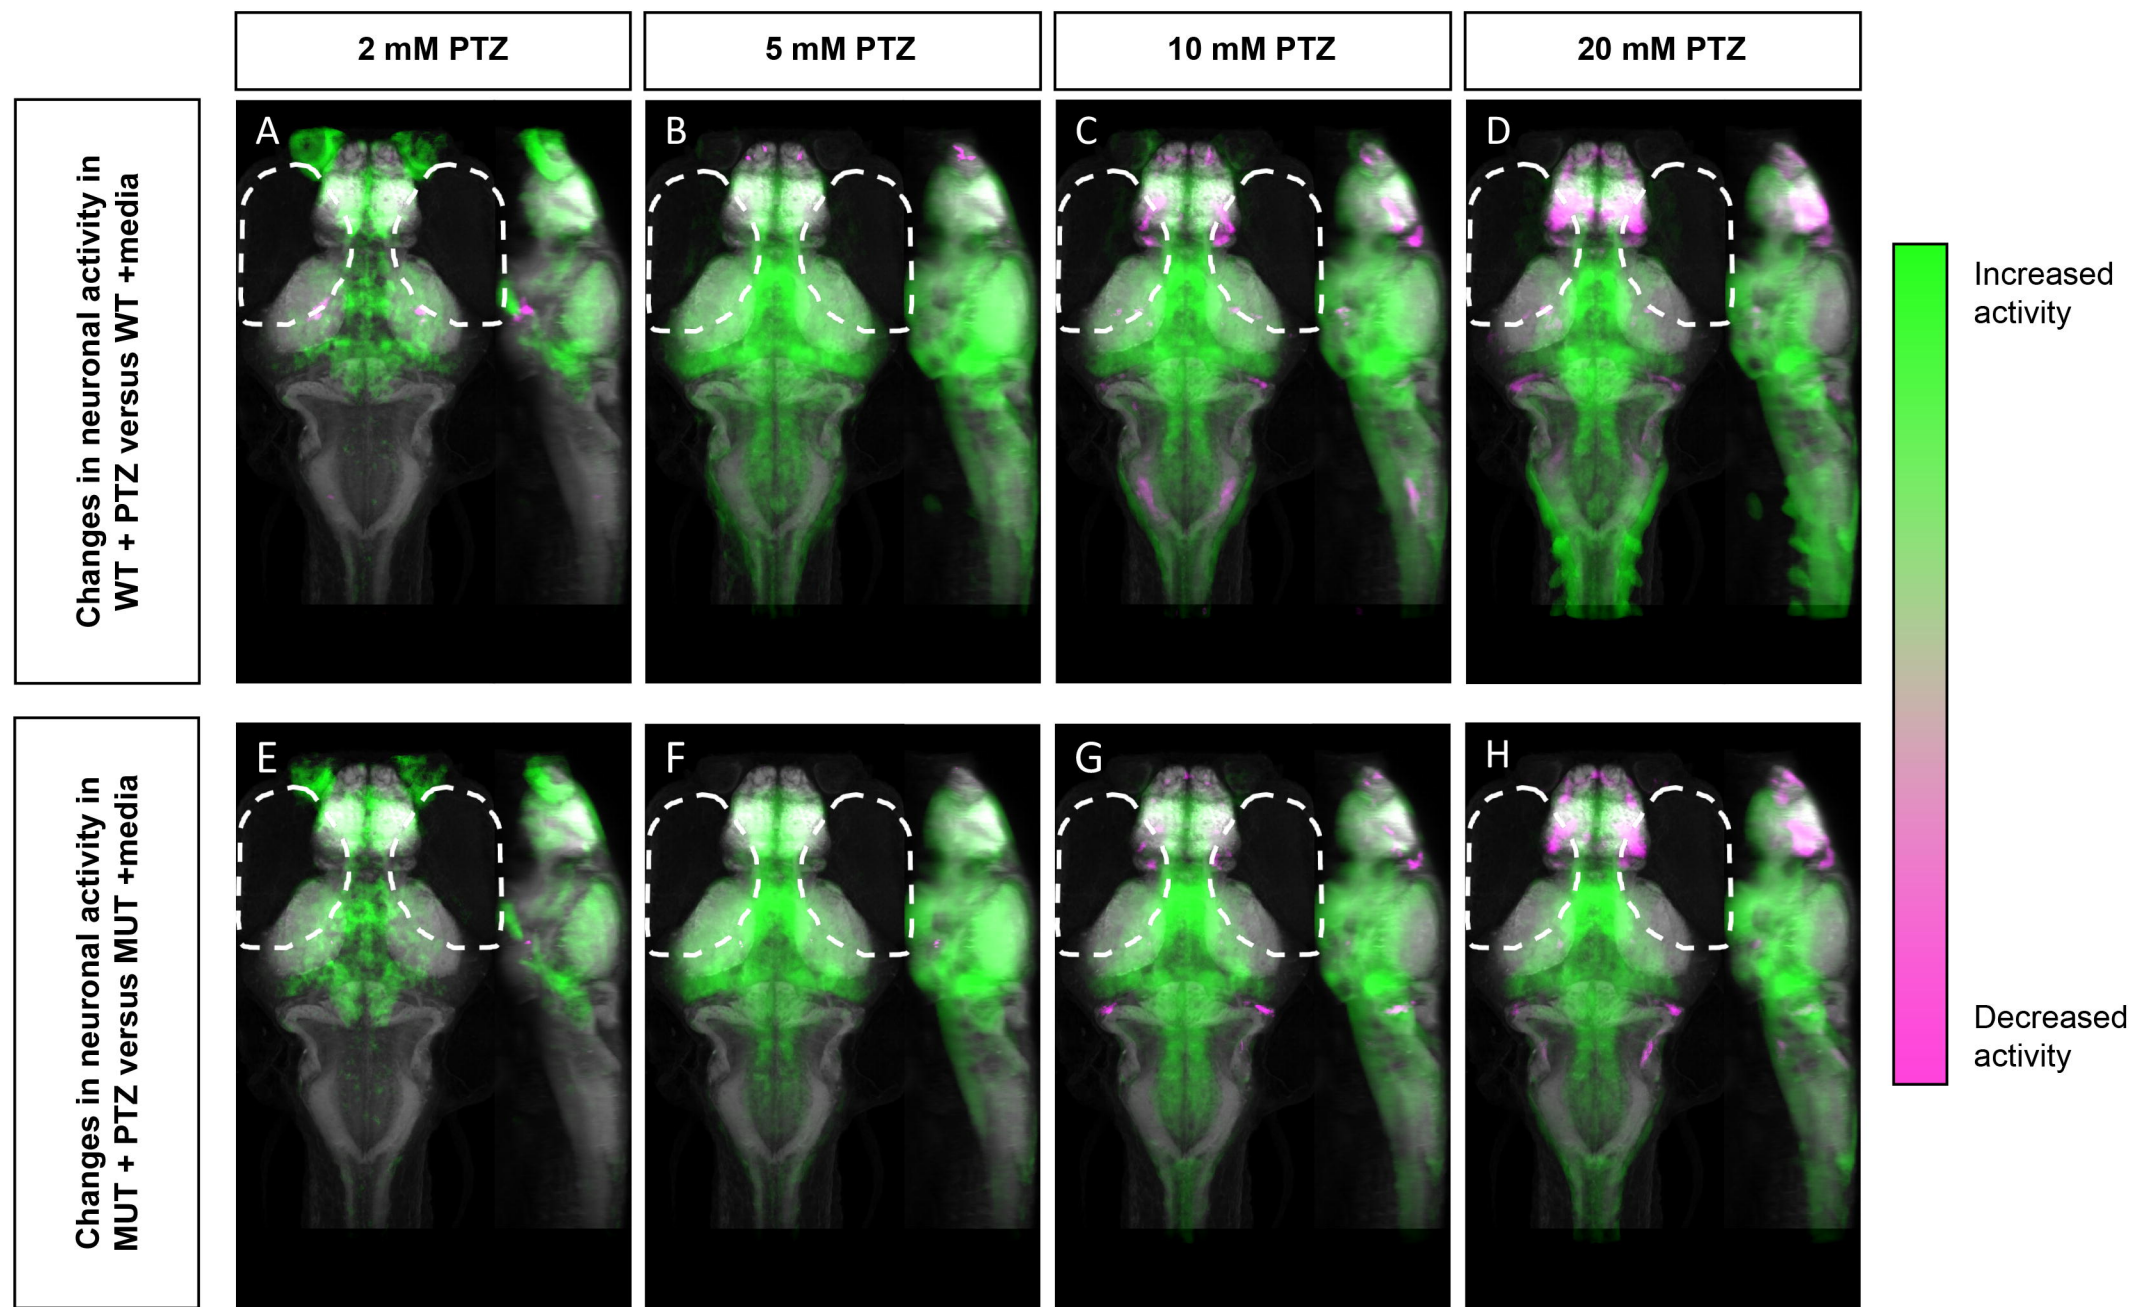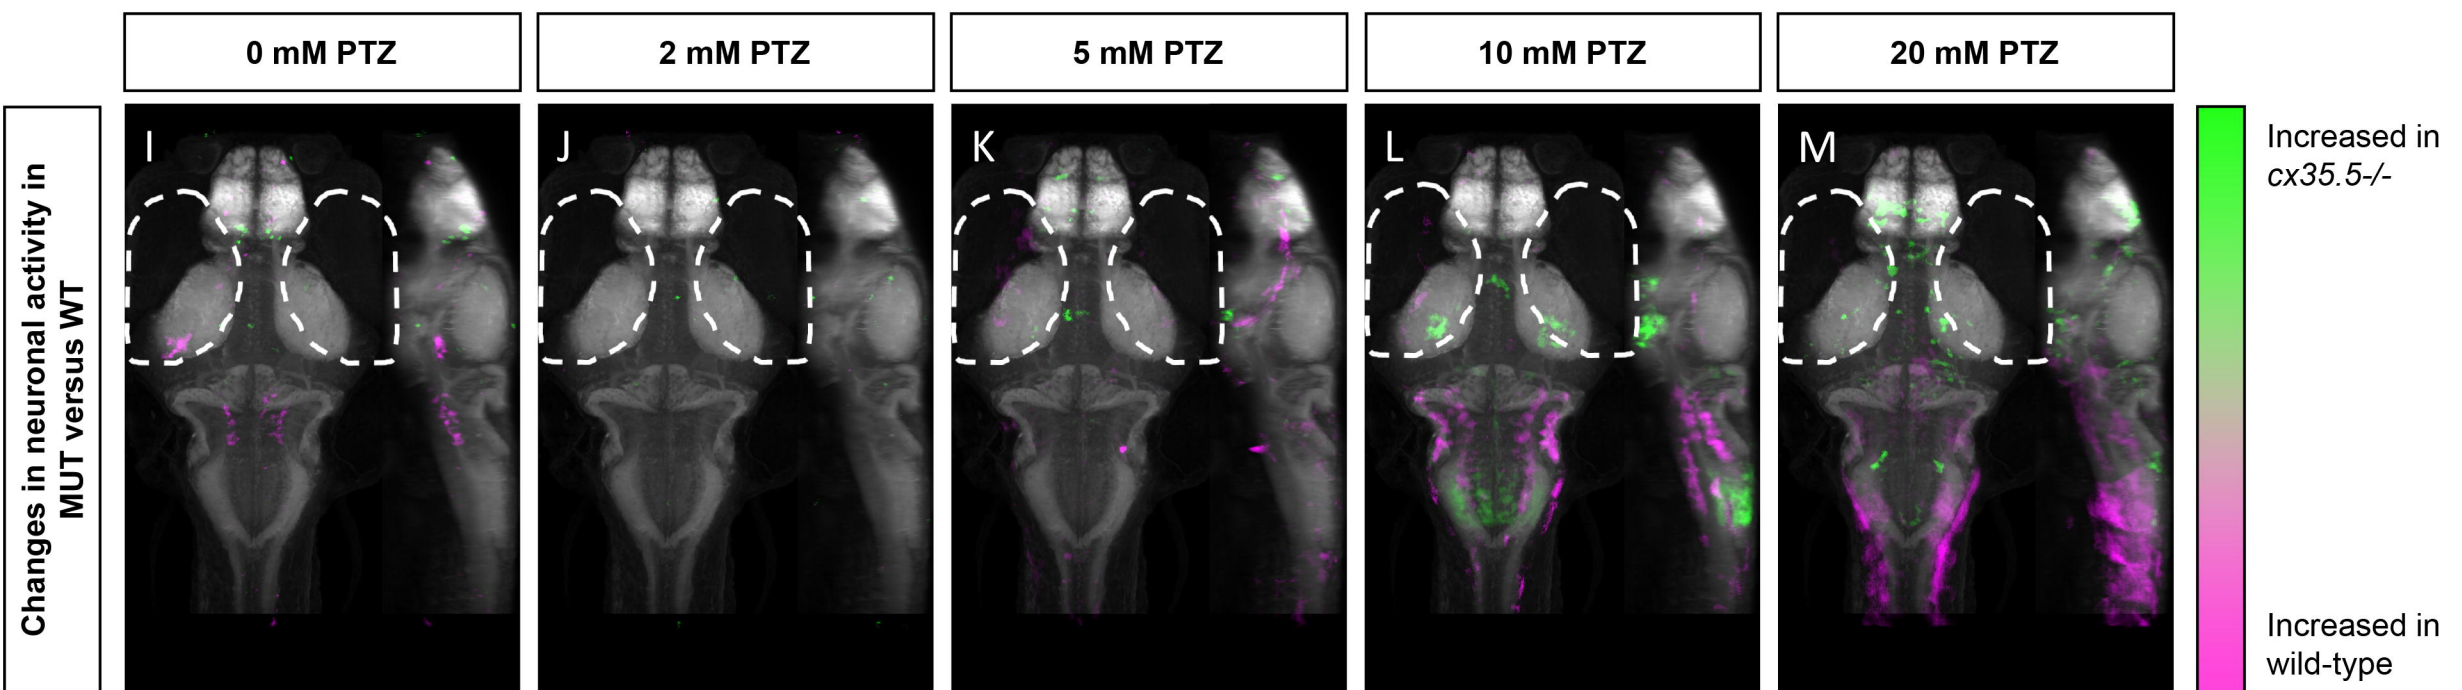



*cx35.5* -/-

*cx35.5* -/-

Embryo Media

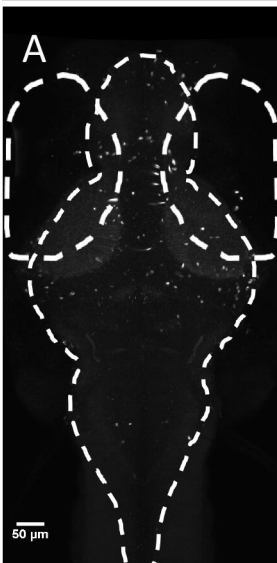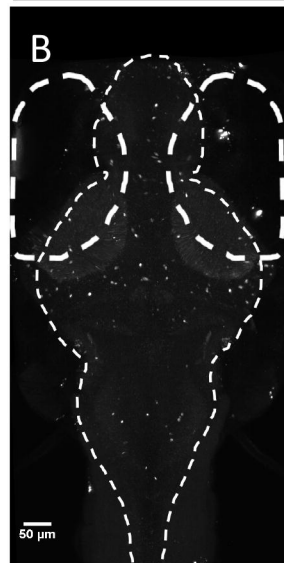

PTZ

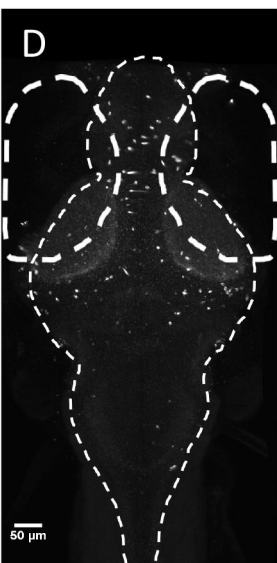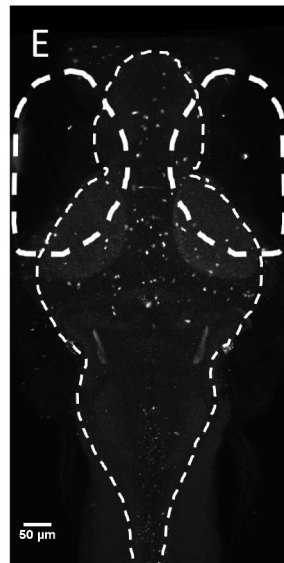

**C** Wild Type vs *cx35.5* -/- Embryo Media

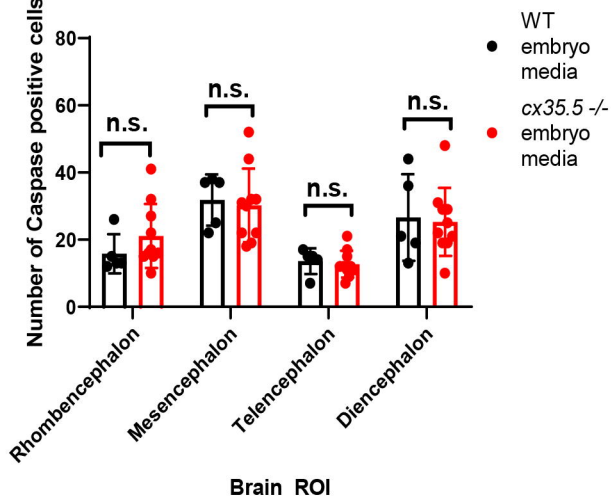

**F** Wild Type vs *cx35.5* -/- PTZ

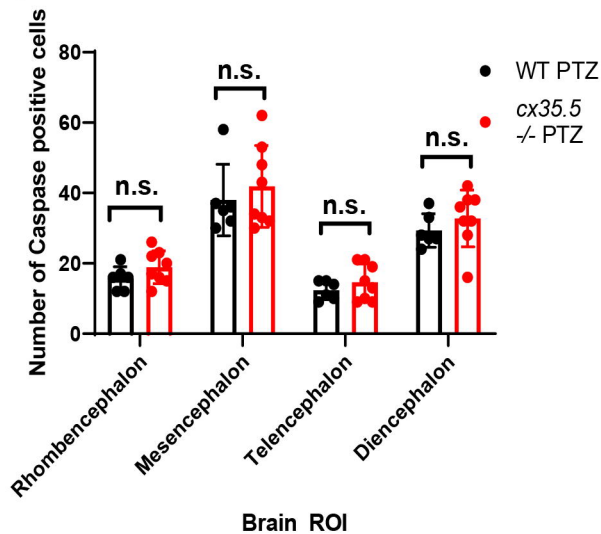

Cx36 antibody labeling

Wild Type

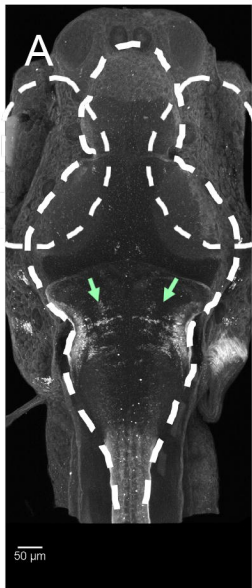

*cx35.5*<sup>-/-</sup>

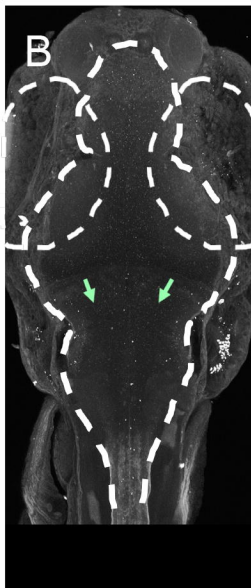

Expression Map

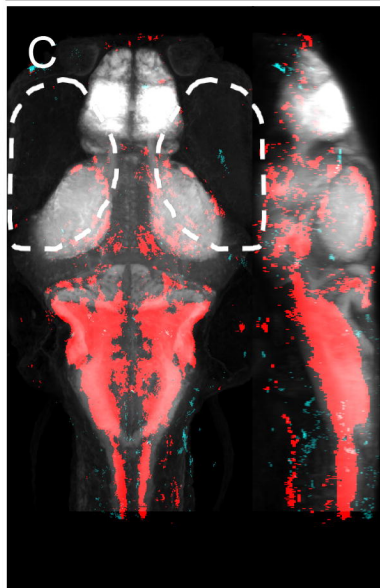

Increased  
Expression

Decreased  
Expression

30 min PTZ

1 hr PTZ

Expression map after PTZ,  
immediate fixation

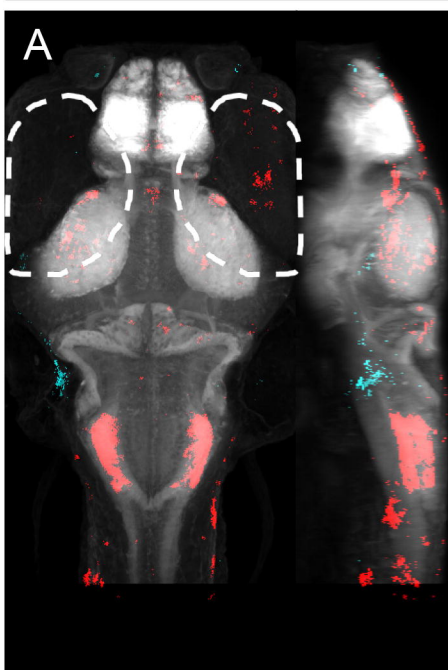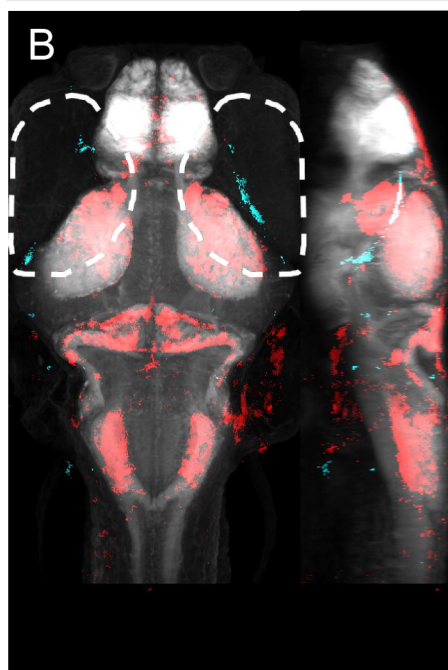

Increased Expression  
Decreased Expression

**G**  
Number of Caspase positive cells

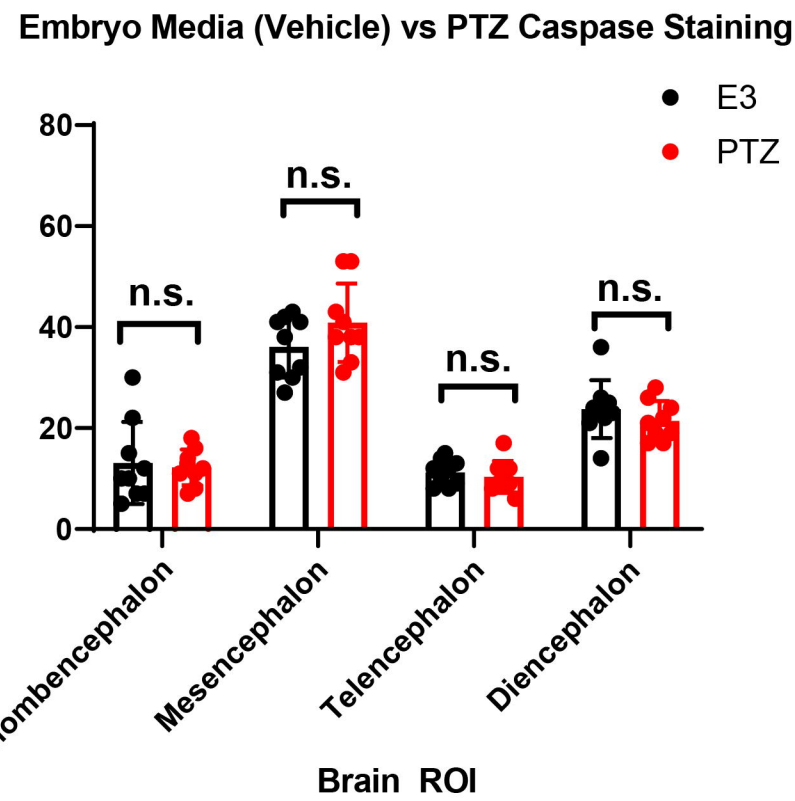

1 hr recovery

3 hr recovery

6 hr recovery

24 hr recovery

Expression map after PTZ,  
fixed after specified recovery  
time

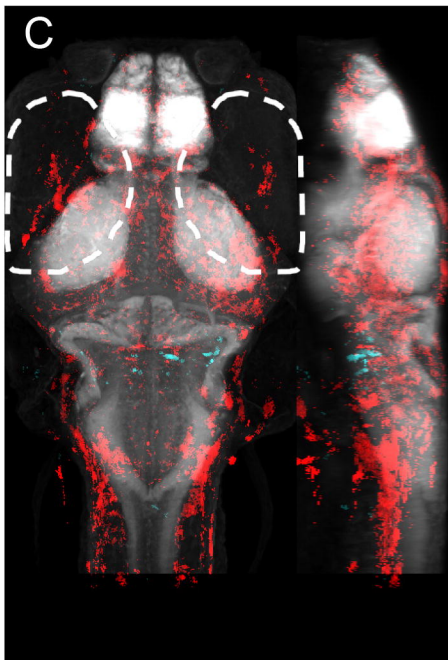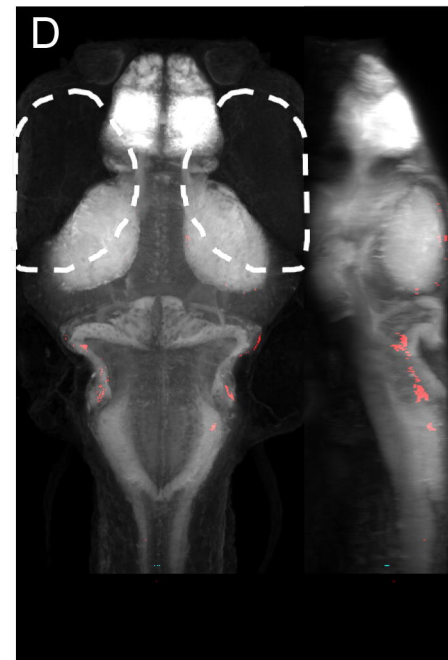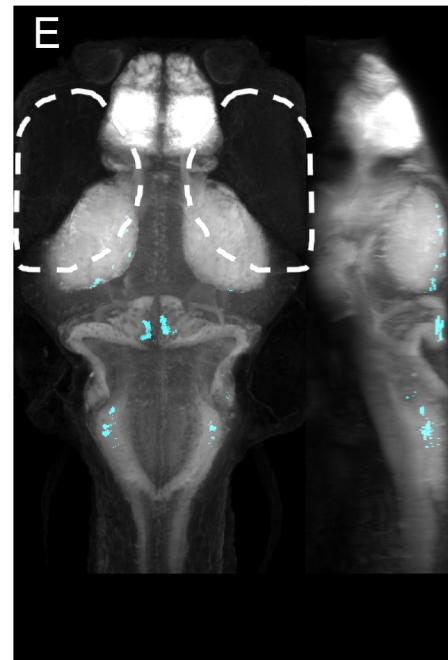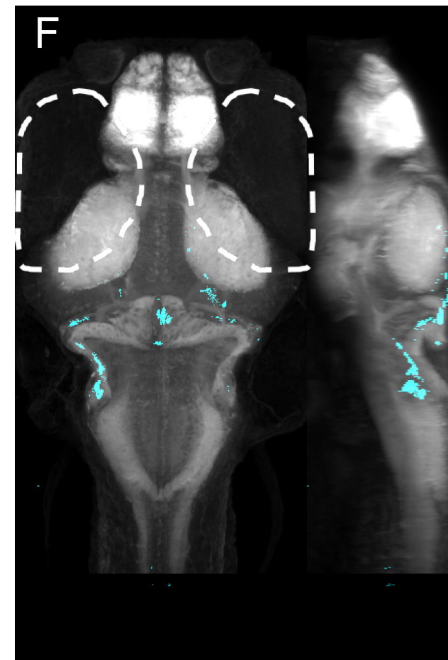

Increased Expression  
Decreased Expression

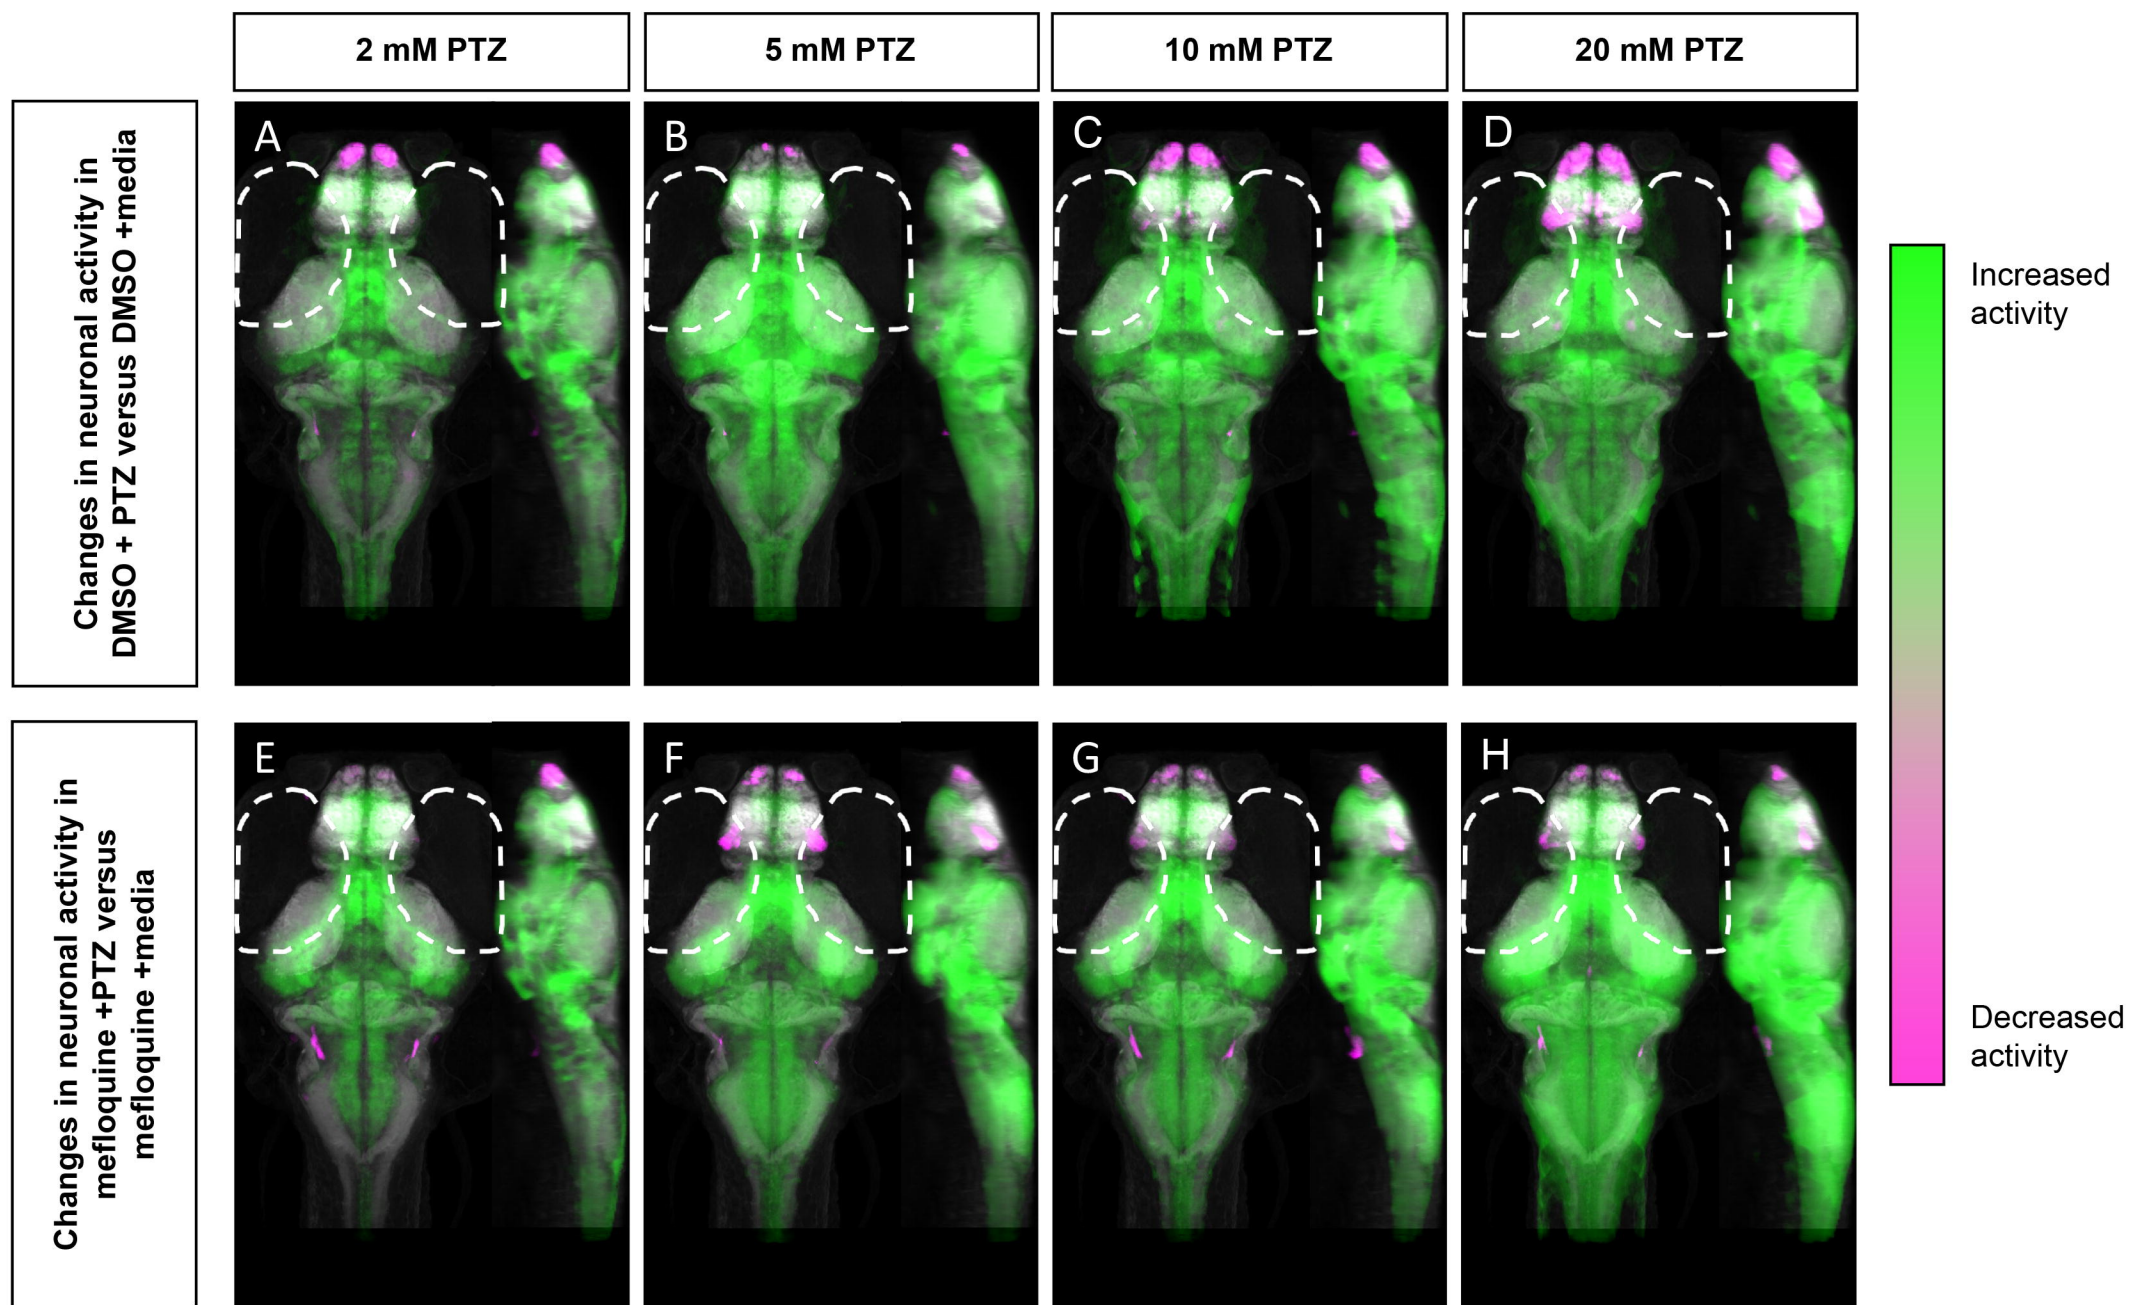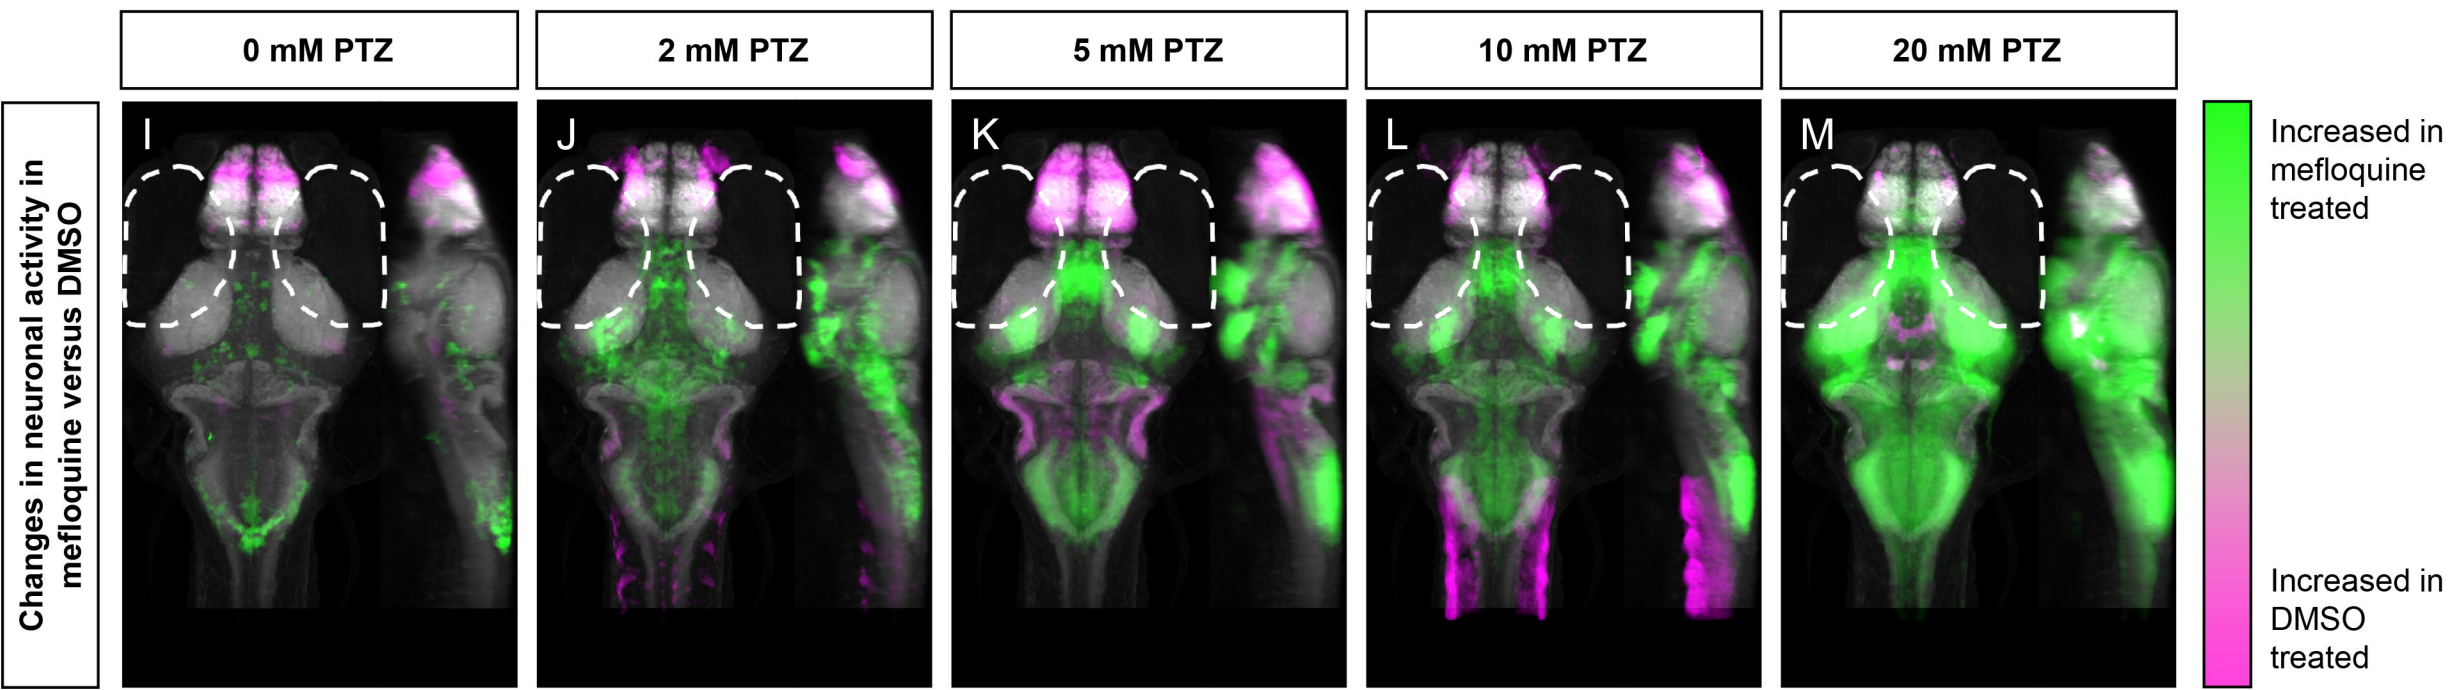

Media

5 mM PTZ

cx35.5<sup>-/-</sup> mefloquine versus DMSO

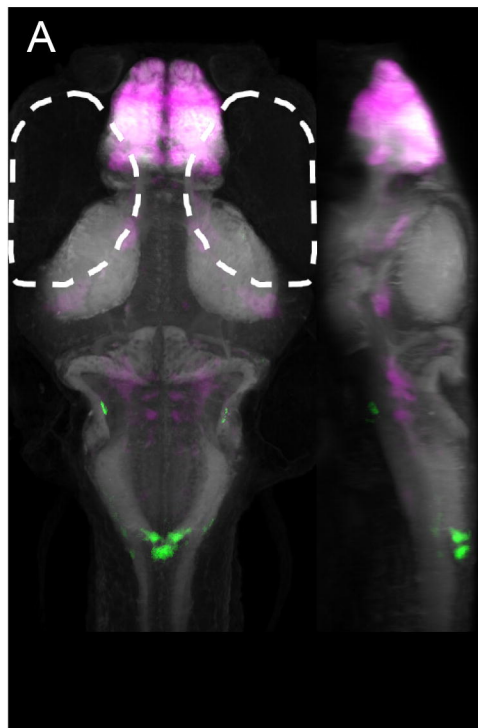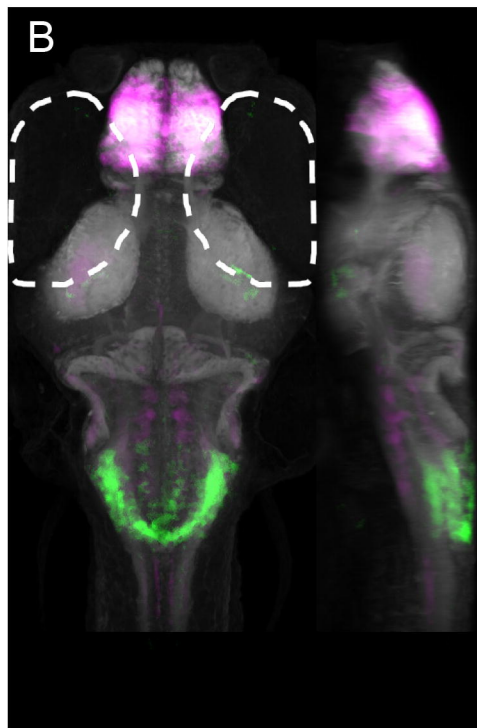

Increased  
activity

Decreased  
activity
